# 1 Forecasting the impact of the first wave of the COVID-19 2 pandemic on hospital demand and deaths for the USA and 3 European Economic Area countries

4 IHME COVID-19 health service utilization forecasting team

5

## 6 Summary

7 **Background:** Hospitals need to plan for the surge in demand in each state or region in the  
8 United States and the European Economic Area (EEA) due to the COVID-19 pandemic. Planners  
9 need forecasts of the most likely trajectory in the coming weeks and will want to plan for the  
10 higher values in the range of those forecasts. To date, forecasts of what is most likely to occur in  
11 the weeks ahead are not available for states in the USA or for all countries in the EEA.

12 **Methods:** This study used data on confirmed COVID-19 deaths by day from local and national  
13 government websites and WHO. Data on hospital capacity and utilisation and observed COVID-  
14 19 utilisation data from select locations were obtained from publicly available sources and direct  
15 contributions of data from select local governments. We develop a mixed effects non-linear  
16 regression framework to estimate the trajectory of the cumulative and daily death rate as a  
17 function of the implementation of social distancing measures, supported by additional evidence  
18 from mobile phone data. An extended mixture model was used in data rich settings to capture  
19 asymmetric daily death patterns. Health service needs were forecast using a micro-simulation  
20 model that estimates hospital admissions, ICU admissions, length of stay, and ventilator need  
21 using available data on clinical practices in COVID-19 patients. We assume that those  
22 jurisdictions that have not implemented school closures, non-essential business closures, and stay  
23 at home orders will do so within twenty-one days.

24 **Findings:** Compared to licensed capacity and average annual occupancy rates, excess demand in  
25 the USA from COVID-19 at the estimated peak of the epidemic (the end of the second week of  
26 April) is predicted to be 9,079 (95% UI 253–61,937) total beds and 9,356 (3,526–29,714) ICU  
27 beds. At the peak of the epidemic, ventilator use is predicted to be 16,545 (8,083–41,991). The  
28 corresponding numbers for EEA countries are 120,080 (119,183–121,107), 32,291 (32,157–  
29 32,425) and 28,973 (28,868–29,085) at a peak of April 6. The date of peak daily deaths varies  
30 from March 30 through May 12 by state in the USA and March 27 through May 4 by country in  
31 the EEA. We estimate that through the end of July, there will be 60,308 (34,063–140,381) deaths  
32 from COVID-19 in the USA and 143,088 (101,131–253,163) deaths in the EEA. Deaths from  
33 COVID-19 are estimated to drop below 0.3 per million between May 4 and June 29 by state in  
34 the USA and between May 4 and July 13 by country in the EEA. Timing of the peak need for  
35 hospital resource requirements varies considerably across states in the USA and across regions of  
36 Europe.

37 **Interpretation:** In addition to a large number of deaths from COVID-19, the epidemic will place  
38 a load on health system resources well beyond the current capacity of hospitals in the USA and

39 EEA to manage, especially for ICU care and ventilator use. These estimates can help inform the  
40 development and implementation of strategies to mitigate this gap, including reducing non-  
41 COVID-19 demand for services and temporarily increasing system capacity. The estimated  
42 excess demand on hospital systems is predicated on the enactment of social distancing measures  
43 within three weeks in all locations that have not done so already and maintenance of these  
44 measures throughout the epidemic, emphasising the importance of implementing, enforcing, and  
45 maintaining these measures to mitigate hospital system overload and prevent deaths.

46 **Funding:** Bill & Melinda Gates Foundation and the state of Washington

47

## 48 Introduction

49 The Coronavirus Disease 2019 (COVID-19) pandemic started in Wuhan, China, in December  
50 2019<sup>1</sup> and has since spread to the vast majority of countries.<sup>2</sup> As of April 16, twelve countries  
51 have recorded more than a thousand deaths: Italy, USA, Spain, France, UK, Iran, China,  
52 Netherlands, Germany, Belgium, Canada, and Switzerland. COVID-19 is not only causing  
53 mortality but is also putting considerable stress on health systems, with large case numbers and  
54 many patients needing critical care including mechanical ventilation. Estimates of the potential  
55 magnitude of COVID-19 patient volume – particularly at the local peak of the epidemic –are  
56 urgently needed for USA and European hospitals still early in the epidemic to effectively manage  
57 the rising case load and provide the highest quality of care possible.

58 COVID-19 scenarios and forecasts have largely been based on mathematical compartmental  
59 models that capture the probability of moving between susceptible, exposed, and infected states,  
60 and then to a recovered state or death (SEIR models). Many SEIR or SIR models have been  
61 published or posted online.<sup>3–20</sup> In general, these models assume random mixing between all  
62 individuals in a given population. While results of these models are sensitive to starting  
63 assumptions and thus differ between models considerably, they generally suggest that given  
64 current estimates of the basic reproductive rate (the number of cases caused by each case in a  
65 susceptible population), 25% to 90% of the population could eventually become infected unless  
66 mitigation measures are put in place and maintained.<sup>6,20</sup> Based on reported case-fatality rates,  
67 these projections imply that there would be millions of deaths in the USA and Europe due to  
68 COVID-19. Individual behavioural responses and government-mandated social distancing  
69 (school closures, non-essential service closures, and shelter-in-place orders), however, can  
70 dramatically influence the course of the epidemic. As of April 14, 2020, for Wuhan City in  
71 China – and also for at least 12 additional regions in Italy (Liguria, Lombardia, Emilia-Romagna,  
72 Marche, Lazio, Campania), Spain (Community of Madrid, Castile and Leon, Catalonia,  
73 Navarre), and the USA (King County, Snohomish County) – strict social distancing has led to  
74 the peak of the first wave of the epidemic, implying that the effective reproduction number  
75 ( $R_{\text{effective}}$ ) has dropped below unity in these settings. Planning tools based on SEIR models  
76 provide high-level information across populations. Few of these planning models have forecasted  
77 peaks in deaths or cases and subsequent declines. Using reported case numbers and models based  
78 on those for health service planning is also not ideal because of widely varying COVID-19  
79 testing rates and strategies. For example, countries such as Germany, Iceland, and South Korea  
80 have undertaken widespread testing, while in the USA and elsewhere, limited test availability

81 has led to largely restricting testing, particularly early in the epidemic, to those with more severe  
82 disease or those who are at risk of serious complications.

83 An alternative strategy is to focus on modelling the empirically observed COVID-19 population  
84 death rate curves, which directly reflect both the transmission of the virus and the infection-  
85 fatality rates in each specific community. Deaths are likely more accurately reported than cases  
86 in settings with limited testing capacity, where tests are usually prioritised for the more severely  
87 ill patients. Hospital service need is likely to be highly correlated with deaths, given predictable  
88 disease progression probabilities by age for severe cases. In this study, we use statistical  
89 modelling to implement this approach and derive state-specific and country-specific forecasts  
90 with uncertainty for deaths and for health service resource needs and compare these to available  
91 resources in the USA and countries in the European Economic Area (EEA). This model is  
92 regularly updated to incorporate new data for the location of interest as well as data from other  
93 locations.

## 94 **Methods**

95 The modelling approach in this study is divided into four components: (i) identification and  
96 processing of COVID-19 data; (ii) statistical model estimation for population death rates as a  
97 function of time since the death rate exceeds a threshold in a location; (iii) predicting time to  
98 exceed a given population death threshold in locations early in the pandemic; and (iv) modelling  
99 health service utilisation as a function of deaths. Additional information on the determination of  
100 hospital resource utilisation and capacity is provided in Appendix A; details on curve fitting  
101 methods, quantification of uncertainty, and a full specification of the statistical model are  
102 available in Appendix B. This study complies with the Guidelines for Accurate and Transparent  
103 Health Estimates Reporting (GATHER) statement.<sup>21</sup>

### 104 **Data identification and processing**

105 Local government, national government, and WHO websites, and third-party aggregators<sup>22–26</sup>  
106 were used to identify data on confirmed COVID-19 deaths by day of death at the first  
107 administrative level (state or province, hereafter “admin 1”). Data on licensed bed and ICU  
108 capacity and average annual utilisation by location were obtained from a variety of sources for  
109 most countries to estimate baseline capacities; observed COVID-19 utilisation data were  
110 obtained for a range of countries and USA states providing information on inpatient and ICU use  
111 or were imputed from available resources (Appendix A). Other parameters were sourced from  
112 the scientific literature and an analysis of available patient-level data. Age-specific data on the  
113 relative population death rate by age are available from China,<sup>28</sup> Italy,<sup>29</sup> South Korea,<sup>30</sup> the  
114 USA,<sup>31,32</sup> Netherlands,<sup>33</sup> Sweden,<sup>34</sup> and Germany<sup>23</sup> and show a strong relationship with age  
115 (Figure 1).

116 Using the average observed relationship between the population death rate and age, data from  
117 different locations can be standardised to the age structure using indirect standardisation  
118 (Appendix B). For the estimation of statistical models for the population death rate, only admin 1  
119 locations with an observed death rate greater than 0.31 per million ( $\exp(-15)$ ) were used. This  
120 threshold was selected by testing which threshold minimised the variance of the slope of the  
121 death rate across locations in subsequent days.

122 Government declarations were used to identify the day that different jurisdictions implemented  
123 various social distancing policies (school closures, closures of non-essential services focused on  
124 bars and restaurants, stay-at-home or shelter-in-place orders, and the deployment of severe travel  
125 restrictions) following the New Zealand government COVID-19 alert schema.<sup>35</sup> Data on timings  
126 of interventions were compiled by checking national and state governmental websites, executive  
127 orders, and newly initiated COVID-19 laws, and cross-referencing other policy compilation  
128 resources (see Supplementary Information). Covariates of days with expected exponential  
129 growth in the cumulative death rate were created using information on the number of days after  
130 the death rate exceeded 0.31 per million that six different social distancing measures were  
131 mandated by local and national governments: school closures, partial non-essential business  
132 closures, complete non-essential business closures, restricting group gatherings, stay-at-home  
133 recommendations, and severe local travel restrictions including public transport closures. To  
134 derive weighting schemes for each of the social distancing mandates, we determined the effect of  
135 social distancing measures on mobility data published by Google (average of retail, workplace,  
136 and transit mobility dimensions),<sup>36</sup> Descartes Lab (distance travelled)<sup>37</sup> and Safegraph (time  
137 spent at home)<sup>38</sup> using random effects regression where the dependent variable was the log of  
138 mobility measures with social distancing measures as a series of dummy variables. The three  
139 different weighting schemes were used to create covariates for an ensemble of three models  
140 (Appendix B, section 5). For locations that have not yet implemented all of the closure measures,  
141 we assumed that the remaining measures will be put in place within 3 weeks. This lag between  
142 reaching a threshold death rate and implementing more aggressive social distancing was  
143 combined with the observed period of exponential growth in multiple locations that reached their  
144 peak after Level 4 social distancing from the New Zealand alert schema<sup>35</sup> was implemented,  
145 adjusted for the median time from incidence to death. For ease of interpretation of statistical  
146 coefficients, this covariate was normalised so the value for Wuhan was 1.

## 147 Statistical model for the cumulative death rate

148 We developed a curve-fitting tool to fit a nonlinear mixed effects model to the available admin 1  
149 cumulative death data. See Appendix B: Curvefit Tool and Analyses for greater detail. The  
150 cumulative death rate for each location is assumed to follow a parametrised Gaussian error  
151 function:

$$152 \quad D(t; \alpha, \beta, p) = \frac{p}{2} \Psi(\alpha(t - \beta)) = \frac{p}{2} \left( 1 + \frac{2}{\sqrt{\pi}} \int_0^{\alpha(t-\beta)} \exp(-\tau^2) d\tau \right)$$

153 where the function  $\Psi$  is the Gaussian error function (written explicitly above),  $p$  controls the  
154 maximum cumulative death rate at each location,  $t$  is the time since death rate exceeded exp(-  
155 15),  $\beta$  (beta) is a location-specific inflection point (time at which rate of increase of the daily  
156 death rate is maximum), and  $\alpha$  (alpha) is a location-specific growth parameter. Other sigmoidal  
157 functional forms (alternatives to  $\Psi$ ) were considered but did not fit the data as well. Data were fit  
158 to the log of the death rate in the available data, using an optimisation framework described in  
159 Appendix B. For data-rich cases, we also developed linear curve fitting extension, where after a  
160 Gaussian curve in daily death is obtained, we fit the data to a weighted combination (with  
161 constraints on weights) of such curves propagated forward and backward in time. The resulting  
162 models can capture more complex behavior in the data.

163 An ensemble of three models was used to produce the estimates. In all models, we parametrised  
164 the time-axis shift parameter  $\beta$  to depend on a covariate based on time from when the initial  
165  $\ln(\text{death rate})$  exceeds  $\exp(-15)$  to the implementation of social distancing. The models differed  
166 by the definition of the social distancing covariate. In each model, the value of the covariate  
167 multiplier was obtained by fitting a joint model on all the locations that were considered to have  
168 peaked; that is, the generalisable information from these locations was the impact that social  
169 distancing had on the time to reach the inflection point. Using 13 locations where peak deaths  
170 had occurred as of April 14, 2020 – China (Wuhan City), Italy (Liguria, Lombardia, Emilia-  
171 Romagna, Marche, Lazio, Campania), Spain (Community of Madrid, Castile and Leon,  
172 Catalonia, Navarre), and the USA (King County, Snohomish County) – we fit mixed effects  
173 models to get the mean and variance of the relationship between the social distancing covariates  
174 and the peak time, and used this information to build priors for location-specific estimates.

175 We use hospitalization data to generate additional short-term predicted deaths (pseudo-data). On  
176 average, the time between hospitalization and death is 8 days. Using location-specific  
177 hospitalization data which has more than 10 deaths, we estimate the ratio of cumulative deaths to  
178 cumulative hospitalizations up to 8 days in the past. We use this ratio to generate pseudo-data for  
179 8 days, and incorporate this pseudo-data into the CurveFit model. Details are given in Section 11  
180 of Appendix B.

181 For locations with fewer than 18 days, we use the following analysis. For each type of model  
182 (based on definition of the covariate), we considered both “short-range” and “long-range”  
183 variants, to explain existing data and forecast long-term trends, respectively. In the former case,  
184 covariate multipliers could deviate from those estimated using peaked locations, while in the  
185 latter, the joint model fit from peaked locations had a larger impact on the final covariate  
186 multiplier. The two remaining parameters (not modelled using covariates) were allowed to vary  
187 among locations to fit location-specific data. Uncertainty for every model was obtained using the  
188 predictive validity framework that analyses errors in predicting out-of-sample observations.  
189 Using these methods, we obtain model realisations using draws, for both short- and long-term  
190 models across the forecast horizon. We then obtain forecasts that linearly interpolate between  
191 short-term and long-term models, with next days closely following short-term models and long-  
192 term forecasts following long-term models. Finally, we ensemble these draws across the model  
193 types (based on the definition of the social distancing covariate).

194 For locations with 18 or more days, we first fit a long-term model, borrowing strength from  
195 peaked locations and obtaining location-specific representative daily deaths Gaussian curves. We  
196 then fit a linear combination of 13 of the inferred Gaussian curves from the long-term model,  
197 placed two days apart (12 days back from the inferred peak to 12 days forward of the inferred  
198 peak). We then ensemble across draws for different model types. See Appendix B (section 11)  
199 for full details.

200 The dataset age-standardised to the age-structure of California is shown in Figure 2.

## 201 [Time to threshold death rate](#)

202 All states except Wyoming have deaths greater than 0.31 per million ( $e^{-15}$ ) and more than 2  
203 deaths and were included in the model estimation along with data on 66 other admin 1 locations.



204 For other USA states or locations in the EEA, we estimated the expected time from the current  
205 case count to reach the threshold level for the population death rate model. Using the observed  
206 distribution of the time from each level of case count to the threshold death rate for all admin 1  
207 locations with data, we estimated this distribution. We used the mean and standard deviation of  
208 days from a given case count to the future threshold death rate to develop the probability  
209 distribution for the day each state will cross over the threshold death rate, and then we applied  
210 the death rate epidemic curve after crossing the threshold.

## 211 Hospital service utilisation microsimulation model

212 From the projected death rates, we estimated hospital service utilisation using an individual-level  
213 microsimulation model – additional details are provided in Appendix A. We simulated deaths by  
214 age using the average age pattern (Figure 1). For each simulated death, we estimated the date of  
215 admission using the median length of stay for deaths from available data (six days). Simulated  
216 individuals requiring admission who were discharged alive were generated using the location-  
217 specific ratios of admissions to deaths; where location-specific ratios were not available we used  
218 the EEA pooled estimate for other EEA countries and the USA pooled estimate for other USA  
219 states. An age pattern of the ratio was based on available data (Appendix A). The age-specific  
220 fraction of admissions requiring ICU care was based on data from the USA. The fraction of ICU  
221 admissions requiring invasive ventilation was estimated as 85%. To determine daily bed and ICU  
222 occupancy and ventilator use, we applied median lengths of stay of eight days for those not  
223 requiring ICU care and discharged alive and 20 days for those admissions with ICU care, with 13  
224 of those days in the ICU.<sup>39</sup>

## 225 Role of the funding source

226 The funders of the study had no role in study design, data collection, data analysis, data  
227 interpretation, or writing of the report. The authors had access to the data in the study and the  
228 final responsibility to submit the paper.

## 229 Results

230 By aggregating forecasts across location, we determined the overall trajectory of expected  
231 health-care needs in different categories and deaths, as shown in Figure 3 for the USA (Panel A)  
232 and for EEA countries (Panel B). These figures highlight the earlier beginning of the epidemic in  
233 EEA countries compared to the USA. The USA projected peak was reached on April 15 with  
234 almost 3,500 deaths daily. In EEA the peak was on April 6 with more than 4,000 deaths daily but  
235 with a flatter peak, reflecting the considerable variability in the timing of the epidemic by  
236 country. Our estimated peak hospital demand was 68,884 (95% UI 34,599–175,312) beds,  
237 18,269 (9,621–44,223) ICU beds and 16,545 (8,083–41,991) ventilators in the USA; for EEA  
238 nations the corresponding numbers were 120,080 (119,183–121,107) hospital beds, 32,291  
239 (32,157–32,425) ICU beds, and 28,973 (28,868–29,085) ventilators.

240 The peak of daily deaths varies considerably between EEA countries and subnational locations  
241 (Figure 4, Panel A) and USA states (Panel B). Several regions in Italy reached their peak by the  
242 end of March, with parts of Spain, France, Netherlands, Norway, Denmark, Greece, and Estonia  
243 following suit by the beginning of April. Other countries such as the UK, Germany, and Sweden

244 are at the peak or are approaching the peak. In the USA, states with earlier peaks include  
245 Washington, Nevada, Arizona, Montana and Florida. States at the peak or just approaching the  
246 peak include Texas, California and parts of New England. States in the middle of the country,  
247 including North Dakota, South Dakota, Iowa and Wyoming are expected to peak later.

248 Figure 5 shows total excess demand for the USA (panel A) and EEA countries (panel B) overall.  
249 In the USA, peak excess demand for hospitalisation above usual capacity was estimated as 9,079  
250 (95% UI 253–61,937); ICU bed excess demand was 9,356 (3,526–29,714). We estimated that  
251 EEA countries experienced a peak excess demand above usual capacity for total beds of 28,270  
252 (0 to 126,788) at peak; the ICU bed shortfall was 16,090 (15,973–16,211). Excess demand is  
253 concentrated in particular countries and USA states as shown in Figure 6, which shows the  
254 percentage excess demand for ICU beds by location: in the USA (panel A), excess demand for  
255 ICU beds is concentrated in New York, New Jersey, Connecticut, Wyoming, Michigan, Rhode  
256 Island, and Massachusetts; in the EEA (panel B), ICU excess demand above usual capacity is  
257 particularly high in Sweden, Spain, Northern Ireland, Italy, France, and Belgium. We have not  
258 been able to estimate current ventilator capacity; however, the number of ventilators per person  
259 implied by the peak (Figure 3) also suggests potentially large gaps in availability of ventilators.

260 Figure 7 shows the expected cumulative death numbers with 95% uncertainty intervals for the  
261 USA (Panel A) and EEA (Panel B). In the USA, the average forecast suggests 60,308 deaths, but  
262 the range is large, from 34,063 to 140,381 deaths. The figure shows that uncertainty widens  
263 markedly as the peak of the epidemic approaches, given that the exact timing of the peak is  
264 uncertain. In the EEA, 91,972 (95% UI 91,212–93,620) deaths have already been recorded so  
265 far, with the majority of these coming from Italy, Spain, and France. Our forecast suggests a  
266 cumulative total of 143,088 (101,131–253,163) deaths in the EEA. A large number of these  
267 deaths are projected to occur in the UK (13,759 observed to date; 37,521 [17,625–89,385] total),  
268 Sweden (1,333 observed to date; 5,890 [1,965–16,883] total), Germany (3,570 observed to date;  
269 4,957 [3,697–9,379] total) and France (18,485 observed to date; 22,555 [19,455–29,314] total).

270 Figure 8 shows a map of the cumulative number of deaths per capita by location for the USA and  
271 EEA. In Europe, the highest number of estimated cumulative deaths per capita are in Italy –  
272 particularly the northern regions – Spain, Belgium, Sweden and the UK. In the USA, states with  
273 the highest per capita deaths are New York, Rhode Island, New Jersey, Connecticut,  
274 Massachusetts, Wyoming, Louisiana, and Michigan.

275 Figure 9 shows the date by location by which projected daily deaths drop below 0.3 per million.  
276 As expected, there is a strong correlation between the timing of the peak daily death and when  
277 the daily death rate will drop below this threshold. In Europe, countries where this will happen  
278 later include the UK, Norway, Denmark, Sweden and the Netherlands. In the USA, states that  
279 will not cross this threshold until the end of May include South Dakota, North Dakota, Iowa,  
280 Oklahoma, Arkansas and Utah.

281 Results for each location are accessible through a visualisation tool at  
282 <http://covid19.healthdata.org/projections> – the estimates presented in this tool will be continually  
283 updated as new data are incorporated and ultimately will supersede the results in this paper.  
284 Summary information on cumulative deaths, the date of peak demand, the peak demand, peak  
285 excess demand, and aggregate demand are provided for each location in Table 1.

## 286 Discussion

287 This study has generated estimates of predicted health service utilisation and deaths due to  
288 COVID-19 by day through the end of July for all USA states and EEA countries, assuming that  
289 social distancing efforts will continue until deaths reach a very low level. The analysis shows  
290 large gaps between need for hospital services and usual capacity, especially for inpatient and  
291 ICU beds. A similar or perhaps even greater gap for ventilators is also likely, but detailed state or  
292 country data on ventilator capacity are not available to directly estimate that gap. Uncertainty in  
293 the time course of the epidemic, its duration, and the peak of utilisation and deaths is large,  
294 particularly for when locations are early in the epidemic and where there are few deaths. Given  
295 this, it is critical to update these projections as the pandemic progresses and new data are  
296 collected. Uncertainty will also be reduced as we gain more knowledge about the epidemic peak  
297 and subsequent decline in daily deaths across more than 13 locations. A critical aspect to the size  
298 of the peak is when aggressive measures for social distancing are implemented in each state,  
299 region, or country and for how long they are maintained. Delays in implementing government-  
300 mandated social distancing and relaxing policies will have an important effect on the resource  
301 gaps that health systems will be required to manage.

302 Our estimates of excess demand show that hospital systems have already or will face difficult  
303 choices to continue providing high-quality care to their patients in need. This model was first  
304 developed for use by the UW Medicine system in Washington state, and the practical experience  
305 of that system provides insight into how it has been useful for planning purposes. From the  
306 perspective of planning for the UW Medicine system, these projections immediately made  
307 apparent the need to rapidly build available capacity. Strategies to do so included suspending  
308 elective and non-urgent surgeries and procedures, while supporting surge planning efforts and  
309 reconfiguration of medical/surgical and ICU beds across the system. These targets also supported  
310 a proactive discussion regarding the potential shift from current standards of care to crisis  
311 standards of care, with the goal to do the most good for the greatest number in the setting of  
312 limited resources.

313 There are a variety of options available to deal with the situation, some of which have already  
314 been implemented or are being implemented. One option is to reduce non-COVID-19 patient  
315 use. In the USA and in many EEA countries, local, state, or national governments have cancelled  
316 elective procedures<sup>40-45</sup> and many, but not all, hospitals have complied. This decision has  
317 significant financial implications for USA health systems, however, as elective procedures are a  
318 major source of revenue.<sup>46</sup> Also, aggressive social distancing policies reduce not only the  
319 transmission of COVID-19 but will likely have the added benefit of reducing health-care  
320 utilisation due to other causes such as injuries.<sup>47</sup> Reducing non-COVID-19 demand alone will  
321 not be sufficient, and strategies to increase capacity are also clearly needed. This includes setting  
322 up additional beds by repurposing unused operating rooms, pre- and post-recovery rooms,  
323 procedural areas, medical and nursing staff quarters, and hallways.

324 Currently, one of the largest constraints on effective care may be the lack of ventilators. One  
325 supplement to ventilator capacity is using anesthesia machines freed up by deferring or  
326 cancelling elective surgeries. Other options go beyond the capacity or control of specific  
327 hospitals. The use of mobile military resources has the potential to address some capacity  
328 limitations, particularly in the USA given the differently timed epidemics across states. Other



329 innovative strategies will need to be found, including the construction of temporary hospital  
330 facilities as has been done in Wuhan,<sup>48</sup> Washington state,<sup>49</sup> New York,<sup>50,51</sup> Italy,<sup>52</sup> France,<sup>53</sup> and  
331 Spain.<sup>54</sup>

332 In this study, we have quantified the potential gap in physical resources, but there is an even  
333 larger potential gap in human resources (HR). Expanding bed capacity beyond licensed bed  
334 capacity may require an even larger increase in the HR to provide care. The average annual bed-  
335 day utilisation rate in the US is 66% and ranges from 46% to 92% among EEA countries. Many  
336 hospital systems are staffed appropriately at their usual capacity utilisation rate, and expanding  
337 even up to, but then potentially well beyond, licensed capacity will require finding substantial  
338 additional HR. Strategies include increasing overtime, training operating room and community  
339 clinic staff in inpatient care or physician specialties in COVID-19 patient care, rehiring recently  
340 separated workers, and the use of volunteers. In academic health systems such as UW Medicine,  
341 clinical faculty time can be redirected from research and teaching to clinical care during the  
342 COVID-19 surge. A more concerning HR bottleneck identified, given the need for ICU care for  
343 COVID-19 patients, is for ICU nurses, for which there are very limited options for increasing  
344 capacity. In addition to HR, what should not be overlooked is the increased demand for supplies  
345 ranging from personal protective equipment (PPE), medication, and ventilator supplies to basics  
346 such as bed linen. Add to these the need to expand other infrastructure required to meet the  
347 COVID-19 surge, such as information technology (IT) for electronic medical records. The  
348 overall financial cost over a short period of time is likely to be enormous, particularly when  
349 juxtaposed against the substantial reductions in revenue for many hospitals due to the  
350 cancellation of elective procedures and the broader economic consequences of social distancing  
351 mandates.

352 Our model suggests that the timing of the implementation of social distancing mandates is a  
353 critical determinant of peak demand and cumulative deaths. Mobility data derived from cell  
354 phone use has provided the basis for evaluating the importance of the different social distancing  
355 mandates included in the social distancing covariate. It is important to note the social distancing  
356 mandates do not capture all variation in mobility, and that the data in some locations suggests  
357 behavioural change prior to the introduction of these mandates. Understanding what drives  
358 individual change, e.g. levels of awareness or fear of the pandemic or the private sector  
359 implementing remote work policies prior to government mandates, will be important for  
360 understanding what may drive the change in behaviour after official social distancing mandates  
361 are relaxed, which is now beginning in some European countries and US States.

362 Based on our experience thus far, we have derived important insights into the epidemic  
363 trajectories and health service demand as data have accumulated. These have led to improved  
364 forecasts reflecting both new data and method refinements.<sup>55,56</sup> For this reason, we are  
365 continuing to revise the model as new data are available, providing an updated forecast for health  
366 service providers, governments, and the public. In some regions that have peaked, such as  
367 regions in Italy like Liguria, or New York, the duration of the peak is much longer than in other  
368 places such as Madrid. The mixture model we use accommodates this longer peak but it remains  
369 unclear why some communities have the prolonged peak and others do not. The prolonged peak  
370 leads to substantially increased total mortality. There is also marked variation across locations in  
371 how steeply the epidemic curve rises, captured by the alpha parameter in our model.  
372 Understanding why some locations have an epidemic like New York and others like Washington

373 State will be important to make robust forecasts in other regions of the world.

374 Any attempt to forecast the COVID-19 epidemic has many limitations. Only a limited number of  
375 locations with generalised epidemics have reached the peak in terms of daily deaths, and only  
376 one has currently brought new cases to near zero, namely Wuhan. Many other locations,  
377 including all other provinces in China, have so far successfully contained transmission,  
378 preventing a general outbreak. Modelling based on one completed epidemic, at least for the first  
379 wave, and many incomplete epidemics is intrinsically challenging. The main limitation of our  
380 study is that observed epidemic curves for COVID-19 deaths define the likely trajectory. In this  
381 study, we do include a covariate meant to capture the timing of social distancing measures and  
382 their effect on various measures of population mobility. Our model also relies on the accuracy of  
383 reporting of deaths due to COVID-19; reports suggest that in some locations not all deaths may  
384 be included in country reported totals.<sup>57,58</sup> Our models explicitly take into account variation in  
385 age-structure, which is a key driver of all-age mortality. But these efforts at quantification do not  
386 take into account many other factors that may influence the epidemic trajectory: sex, the  
387 prevalence of co-morbidity, population density, individual behavior change not captured by  
388 mobility metrics, and a host of other individual factors that may potentially influence the  
389 immune response. We also have not explicitly incorporated the effect of reduced quality of care  
390 due to stressed and overloaded health systems beyond what is captured in the data. For example,  
391 the higher mortality rate in Italy may in part be due to policies around restricting invasive  
392 ventilation in the elderly. The model ensemble used does suggest that locations with faster  
393 increases in the death rate are likely to have greater peak caseload and cumulative deaths, but our  
394 uncertainty intervals are appropriately large. Finally, it is critical to note that we restrict our  
395 projections to the first wave of the pandemic under a scenario of continued implementation of  
396 social distancing mandates and do not yet incorporate the possibility of a resurgence or  
397 subsequent waves. This is an essential area for future work.

## 398 Conclusion

399 COVID-19 is an extraordinary challenge to health and the health-care system. In this study, we  
400 forecast a large excess of demand for hospital bed-days and ICU bed-days and our estimate of  
401 1,584,737 (95% UI 1,050,954–3,082,999) deaths in the USA and EEA from the first wave of  
402 pandemic is an alarming number. This number could be substantially higher if excess demand  
403 for health system resources is not addressed and if social distancing policies are not continued,  
404 vigorously implemented, and enforced. This planning model will hopefully provide an up-to-date  
405 tool for improved hospital resource allocation.

406

407

408

409

## 410 List of Figures and Tables

411 **Figure 1.** Normalised age-pattern of death based on data from China, Italy, South Korea,  
412 Germany, the Netherlands, Sweden, and the USA

413 **Figure 2.** Death rate data age-standardised to California as a function of time since a threshold  
414 death rate of 0.3 per million

415 **Figure 3.** Estimates of hospitalisation and deaths by day for the USA (Panel A) and EEA (Panel  
416 B)

417 **Figure 4.** Date of peak daily deaths by location for the USA (Panel A) and EEA (Panel B)

418 **Figure 5.** Excess demand for services above currently available capacity

419 **Figure 6.** Peak percentage excess demand by location for ICU beds for the USA (Panel A) and  
420 EEA (Panel B)

421 **Figure 7.** Expected cumulative death numbers with 95% uncertainty intervals for the US (Panel  
422 A) and EEA (Panel B)

423 **Figure 8.** Cumulative deaths per 100,000 population for the USA (Panel A) and EEA (Panel B).

424 **Figure 9.** Date at which the daily death rate is projected to drop below 0.3 per million by  
425 location for the USA (Panel A) and EEA (Panel B)

426 **Table 1.** Summary information on deaths, peak demand, peak excess demand, and aggregate  
427 demand by location

428

429

## 430 References

431

432 1 Hui DS, I Azhar E, Madani TA, *et al.* The continuing 2019-nCoV epidemic threat of novel  
433 coronaviruses to global health—The latest 2019 novel coronavirus outbreak in Wuhan, China.  
434 *Int J Infect Dis* 2020; **91**: 264–266.

435 2 WHO. Coronavirus disease 2019 (COVID-19) Situation Report – 62. 2020; published online  
436 March 22. [https://www.who.int/emergencies/diseases/novel-coronavirus-2019/situation-](https://www.who.int/emergencies/diseases/novel-coronavirus-2019/situation-reports)  
437 [reports](https://www.who.int/emergencies/diseases/novel-coronavirus-2019/situation-reports) (accessed March 22, 2020).

438 3 Li R, Pei S, Chen B, *et al.* Substantial undocumented infection facilitates the rapid  
439 dissemination of novel coronavirus (SARS-CoV2). *Science* 2020; published online March 16.  
440 DOI:DOI: 10.1126/science.abb3221.

441 4 Ferguson NM, Laydon D, Nedjati-Gilani G, *et al.* Impact of non-pharmaceutical interventions  
442 (NPIs) to reduce COVID-19 mortality and healthcare demand. *Imp Coll COVID-19 Response*  
443 *Team* 2020; : 20.

444 5 Binti Hamza F, Lau C, Nazri H, *et al.* CoronaTracker: World-wide COVID-19 Outbreak Data  
445 Analysis and Prediction. *Bull World Health Organ* 2020; published online March 19.  
446 DOI:(<http://dx.doi.org/10.2471/BLT.20.251561>).

447 6 Tsai TC, Jacobson B, Jha AK. American hospital capacity and projected need for COVID-19  
448 patient care. *Health Aff (Millwood)* 2020; published online March 17.  
449 DOI:10.1377/hblog20200317.457910.

450 7 Kucharski AJ, Russell TW, Diamond C, *et al.* Early dynamics of transmission and control of  
451 COVID-19: a mathematical modelling study. *Lancet Infect Dis* 2020; published online March  
452 11. DOI:10.1016/S1473-3099(20)30144-4.

453 8 Wu JT, Leung K, Leung GM. Nowcasting and forecasting the potential domestic and  
454 international spread of the 2019-nCoV outbreak originating in Wuhan, China: a modelling  
455 study. *The Lancet* 2020; **395**: 689–97.

456 9 Predictive Healthcare Team, Penn Medicine. COVID-19 hospital impact model for epidemics.  
457 2020; published online March 24. <https://penn-chime.phl.io/> (accessed March 24, 2020).

458 10 Wilson C. Exclusive: here’s how fast the coronavirus could infect over 1 million Americans.  
459 *Time* 2020; published online March 12. [https://time.com/5801726/coronavirus-models-](https://time.com/5801726/coronavirus-models-forecast/)  
460 [forecast/](https://time.com/5801726/coronavirus-models-forecast/) (accessed March 24, 2020).

461 11 Anastassopoulou, C, Russo L, Tsakris A, Siettos C. Data-based analysis, modelling and  
462 forecasting of the COVID-19 outbreak. *MedRxiv* 2020; published online March 12.  
463 DOI:<https://doi.org/10.1101/2020.02.11.20022186>.

- 464 12Roosa K, Lee Y, Luo R, *et al.* Real-time forecasts of the COVID-19 epidemic in China from  
465 February 5th to February 24th, 2020. *Infect Dis Model* 2020; **5**: 256–63.
- 466 13Roosa K, Lee Y, Luo R, *et al.* Short-term Forecasts of the COVID-19 Epidemic in Guangdong  
467 and Zhejiang, China: February 13–23, 2020. *J Clin Med* 2020; **9**: 596.
- 468 14Georgia State University, School of Public Health. Coronavirus Incidence Forecasts. Wkly.  
469 Incid. Rep. <https://publichealth.gsu.edu/research/coronavirus/> (accessed March 24, 2020).
- 470 15Carnegie Mellon University. Mathematical model shows heterogeneous approach might be  
471 best for reducing COVID-19 deaths. Mellon Coll. Sci. 2020; published online March 17.  
472 [http://www.cmu.edu/mcs/news-events/2020/0318\\_covid-19-math-model.html](http://www.cmu.edu/mcs/news-events/2020/0318_covid-19-math-model.html) (accessed  
473 March 24, 2020).
- 474 16Massonnaud C, Roux J, Crépey P. COVID-19: Forecasting short term hospital needs in  
475 France. *medRxiv* 2020; published online March 20.  
476 DOI:<https://doi.org/10.1101/2020.03.16.20036939>.
- 477 17Alsinglawi B, Elkhodr M, Mubin O. COVID-19 death toll estimated to reach 3,900 by next  
478 Friday, according to AI modelling. *The Conversation*. [http://theconversation.com/covid-19-](http://theconversation.com/covid-19-death-toll-estimated-to-reach-3-900-by-next-friday-according-to-ai-modelling-133052)  
479 [death-toll-estimated-to-reach-3-900-by-next-friday-according-to-ai-modelling-133052](http://theconversation.com/covid-19-death-toll-estimated-to-reach-3-900-by-next-friday-according-to-ai-modelling-133052)  
480 (accessed March 24, 2020).
- 481 18Thomala LL. Projected worst impact on China’s GDP growth by COVID-19 outbreak 2020.  
482 Statista. [https://www.statista.com/statistics/1102691/china-estimated-coronavirus-covid-19-](https://www.statista.com/statistics/1102691/china-estimated-coronavirus-covid-19-impact-on-gdp-growth/)  
483 [impact-on-gdp-growth/](https://www.statista.com/statistics/1102691/china-estimated-coronavirus-covid-19-impact-on-gdp-growth/) (accessed March 24, 2020).
- 484 19Hao K. This is how the CDC is trying to forecast coronavirus’s spread. *MIT Technol Rev*  
485 2020; published online March 13. [https://www.technologyreview.com/s/615360/cdc-cmu-](https://www.technologyreview.com/s/615360/cdc-cmu-forecasts-coronavirus-spread/)  
486 [forecasts-coronavirus-spread/](https://www.technologyreview.com/s/615360/cdc-cmu-forecasts-coronavirus-spread/) (accessed March 24, 2020).
- 487 20Danner C. CDC’s worst-case coronavirus Model: 214M infected, 1.7M dead. *N Y Mag Intell*  
488 2020; published online March 13. [https://nymag.com/intelligencer/2020/03/cdcs-worst-case-](https://nymag.com/intelligencer/2020/03/cdcs-worst-case-coronavirus-model-210m-infected-1-7m-dead.html)  
489 [coronavirus-model-210m-infected-1-7m-dead.html](https://nymag.com/intelligencer/2020/03/cdcs-worst-case-coronavirus-model-210m-infected-1-7m-dead.html) (accessed March 24, 2020).
- 490 21Stevens GA, Alkema L, Black RE, *et al.* Guidelines for accurate and transparent health  
491 estimates reporting: the GATHER statement. *The Lancet* 2016; **388**: e19–e23.
- 492 22Presidenza del Consiglio dei Ministri - Dipartimento della Protezione Civile. COVID-19 data  
493 Italy. 2020; published online March 24. <https://github.com/pcm-dpc/COVID-19> (accessed  
494 March 23, 2020).
- 495 23Robert Koch Institut. Current situation report of the Robert Koch Institute on COVID-19.  
496 2020; published online March 23.  
497 [https://www.rki.de/DE/Content/InfAZ/N/Neuartiges\\_Coronavirus/Situationsberichte/Gesamt.](https://www.rki.de/DE/Content/InfAZ/N/Neuartiges_Coronavirus/Situationsberichte/Gesamt.html)  
498 [html](https://www.rki.de/DE/Content/InfAZ/N/Neuartiges_Coronavirus/Situationsberichte/Gesamt.html) (accessed March 23, 2020).



- 499 24Ministry of Health, Consumption and Social Welfare. Novel coronavirus disease, COVID-19  
500 in Spain. *Curr. Situat. Coronavirus*. 2020; published online March 23.  
501 [https://www.mscbs.gob.es/profesionales/saludPublica/ccayes/alertasActual/nCov-](https://www.mscbs.gob.es/profesionales/saludPublica/ccayes/alertasActual/nCov-China/situacionActual.htm)  
502 [China/situacionActual.htm](https://www.mscbs.gob.es/profesionales/saludPublica/ccayes/alertasActual/nCov-China/situacionActual.htm) (accessed March 23, 2020).
- 503 25Health Commission of Hubei Province. Epidemic situation of new crown pneumonia in Hubei  
504 Province. [http://wjw.hubei.gov.cn/fbjd/dtyw/index\\_1.shtml](http://wjw.hubei.gov.cn/fbjd/dtyw/index_1.shtml) (accessed March 23, 2020).
- 505 26JHU CSSE. 2019 Novel Coronavirus COVID-19 (2019-nCoV) Data Repository by Johns  
506 Hopkins CSSE. GitHub. 2020; published online March 24.  
507 <https://github.com/CSSEGISandData/COVID-19> (accessed March 23, 2020).
- 508 27Xu B, Gutierrez B, Mekaru S, *et al.* Epidemiological data from the COVID-19 outbreak, real-  
509 time case information. *Sci Data* 2020; **7**: 1–6.
- 510 28Novel Coronavirus Pneumonia Emergency Response Epidemiology Team. The  
511 epidemiological characteristics of an outbreak of 2019 novel Coronavirus diseases (COVID-  
512 19) — China, 2020. *China CDC Wkly* 2020; **2**.
- 513 29Task force COVID-19 del Dipartimento Malattie Infettive e Servizio di Informatica.  
514 Sorveglianza Integrata COVID-19 in Italia. Istituto Superiore di Sanità, 2020  
515 <https://www.docdroid.net/xxzxtmG/infografica-17marzo-ita.pdf>.
- 516 30Korea CDC. The Updates of COVID-19 in Republic of Korea. Press Release. 2020; published  
517 online March 18. <http://www.cdc.go.kr> (accessed March 23, 2020).
- 518 31CDC COVID-19 Response Team. Severe outcomes among patients with coronavirus disease  
519 2019 (COVID-19) — United States, February 12–March 16, 2020. *MMWR Morb Mortal Wkly*  
520 *Rep* 2020; **69**. <https://www.cdc.gov/mmwr/volumes/69/wr/pdfs/mm6912e2-H.pdf>.
- 521 32Centers for Disease Control and Prevention (CDC). Personal Communication. 2020;  
522 published online March 24.
- 523 33Rijksinstituut voor Volksgezondheid en Milieu. Epidemiologische situatie COVID-19 in  
524 Nederland. 2020.
- 525 34Veckorapporter om covid-19 — Folkhälsomyndigheten. Wkly. Rep. Covid-19.  
526 [http://www.folkhalsomyndigheten.se/folkhalsorapportering-statistik/statistik-a-](http://www.folkhalsomyndigheten.se/folkhalsorapportering-statistik/statistik-a-o/sjukdomsstatistik/covid-19-veckorapporter/)  
527 [o/sjukdomsstatistik/covid-19-veckorapporter/](http://www.folkhalsomyndigheten.se/folkhalsorapportering-statistik/statistik-a-o/sjukdomsstatistik/covid-19-veckorapporter/) (accessed April 10, 2020).
- 528 35New Zealand Government. COVID-19 Alert System. Unite COVID-19. 2020; published  
529 online March 24. <https://covid19.govt.nz/government-actions/covid-19-alert-system/>  
530 (accessed March 23, 2020).
- 531 36Google. See how your community is moving around differently due to COVID-19. COVID-  
532 19 Community Mobil. Rep. <https://www.google.com/covid19/mobility/>.

- 533 37Descartes Labs. Coronavirus: Changes in US mobility.  
534 <https://www.descarteslabs.com/mobility/>.
- 535 38Safegraph. US geographic responses to shelter in place orders. Shelter Place Index Impact  
536 Coronavirus Hum. Mov. <https://www.safegraph.com/dashboard/covid19-shelter-in-place>.
- 537 39Zhou F, Yu T, Du R, *et al*. Clinical course and risk factors for mortality of adult inpatients  
538 with COVID-19 in Wuhan, China: a retrospective cohort study. *The Lancet* 2020.
- 539 40Governor's Office. Proclamation by the Governor amending proclamation 20-05; 20-24  
540 Restrictions on Non Urgent Medical Procedures. 2020; published online March 19.  
541 <https://www.governor.wa.gov/node/495945>.
- 542 41Ohio Department of Health. Director's Order for the management of non-essential surgeries  
543 and procedures throughout Ohio | Director Amy Acton. 2020; published online March 17.  
544 [https://www.documentcloud.org/documents/6816633-Director-s-Order-Non-Essential-](https://www.documentcloud.org/documents/6816633-Director-s-Order-Non-Essential-Surgery.html)  
545 [Surgery.html](https://www.documentcloud.org/documents/6816633-Director-s-Order-Non-Essential-Surgery.html).
- 546 42Governor's Office. Colorado continues to take action in response to COVID-19. Press  
547 Release. 2020; published online March 19.  
548 <https://www.colorado.gov/governor/news/colorado-continues-take-action-response-covid-19>  
549 (accessed March 22, 2020).
- 550 43Hospitals move to cancel appointments, elective surgery. RTÉ. 2020; published online March  
551 16. [https://www.rte.ie/news/2020/03/16/1123584-hospitals-move-to-cancel-appointments-](https://www.rte.ie/news/2020/03/16/1123584-hospitals-move-to-cancel-appointments-elective-surgery/)  
552 [elective-surgery/](https://www.rte.ie/news/2020/03/16/1123584-hospitals-move-to-cancel-appointments-elective-surgery/) (accessed April 6, 2020).
- 553 44Blanckaert J. Coronavirus and private practice in Belgium. *EuroTimes*  
554 <https://www.eurotimes.org/coronavirus-and-private-practice/> (accessed April 6, 2020).
- 555 45Legido-Quigley H, Mateos-García JT, Campos VR, Gea-Sánchez M, Muntaner C, McKee M.  
556 The resilience of the Spanish health system against the COVID-19 pandemic. *Lancet Public*  
557 *Health* 2020; **early online**. DOI:10.1016/S2468-2667(20)30060-8.
- 558 46O'Donnell J. Elective surgeries continue at some US hospitals during coronavirus outbreak  
559 despite supply and safety worries. USA Today. 2020; published online March 21.  
560 [https://www.usatoday.com/story/news/health/2020/03/21/hospitals-doing-elective-surgery-](https://www.usatoday.com/story/news/health/2020/03/21/hospitals-doing-elective-surgery-despite-covid-19-risk-short-supplies/2881141001/)  
561 [despite-covid-19-risk-short-supplies/2881141001/](https://www.usatoday.com/story/news/health/2020/03/21/hospitals-doing-elective-surgery-despite-covid-19-risk-short-supplies/2881141001/) (accessed March 22, 2020).
- 562 47Werner D. COVID-19 could reduce traffic deaths. Adirond. Dly. Enterp. 2020; published  
563 online April 9. [https://www.adirondackdailyenterprise.com/opinion/columns/safety-on-the-](https://www.adirondackdailyenterprise.com/opinion/columns/safety-on-the-roads-by-dave-werner/2020/03/covid-19-could-reduce-traffic-deaths/)  
564 [roads-by-dave-werner/2020/03/covid-19-could-reduce-traffic-deaths/](https://www.adirondackdailyenterprise.com/opinion/columns/safety-on-the-roads-by-dave-werner/2020/03/covid-19-could-reduce-traffic-deaths/) (accessed April 10,  
565 2020).
- 566 48Wang J, Zhu E, Umlauf T. How China built two Coronavirus hospitals in just over a week.  
567 Wall Str. J. 2020; published online Feb 26. [https://www.wsj.com/articles/how-china-can-](https://www.wsj.com/articles/how-china-can-build-a-coronavirus-hospital-in-10-days-11580397751)  
568 [build-a-coronavirus-hospital-in-10-days-11580397751](https://www.wsj.com/articles/how-china-can-build-a-coronavirus-hospital-in-10-days-11580397751) (accessed March 22, 2020).

- 569 49 Bush E. King County to put 200-bed field hospital on Shoreline soccer field amid coronavirus  
570 outbreak. *Seattle Times*. 2020; published online March 18.  
571 [https://www.seattletimes.com/seattle-news/health/king-county-to-put-200-bed-field-hospital-](https://www.seattletimes.com/seattle-news/health/king-county-to-put-200-bed-field-hospital-on-shoreline-soccer-field-amid-coronavirus-outbreak/)  
572 [on-shoreline-soccer-field-amid-coronavirus-outbreak/](https://www.seattletimes.com/seattle-news/health/king-county-to-put-200-bed-field-hospital-on-shoreline-soccer-field-amid-coronavirus-outbreak/).
- 573 50 Governor's Office. Governor Cuomo Announces Four Sites Identified by Army Corps of  
574 Engineers on Initial List of Temporary Hospitals. Press Release. 2020; published online  
575 March 21. [https://www.governor.ny.gov/news/governor-cuomo-announces-four-sites-](https://www.governor.ny.gov/news/governor-cuomo-announces-four-sites-identified-army-corps-engineers-initial-list-temporary)  
576 [identified-army-corps-engineers-initial-list-temporary](https://www.governor.ny.gov/news/governor-cuomo-announces-four-sites-identified-army-corps-engineers-initial-list-temporary).
- 577 51 Ankel S. Photos show the National Guard converting New York City's Javits Center into a  
578 disaster hospital for coronavirus patients. *Bus Insid* [https://www.businessinsider.com/photos-](https://www.businessinsider.com/photos-emergency-coronavirus-hospital-built-in-nyc-javits-center-2020-3)  
579 [emergency-coronavirus-hospital-built-in-nyc-javits-center-2020-3](https://www.businessinsider.com/photos-emergency-coronavirus-hospital-built-in-nyc-javits-center-2020-3) (accessed March 25, 2020).
- 580 52 Horowitz J. Italy's Health Care System Groans Under Coronavirus — a Warning to the  
581 World. *N. Y. Times*. 2020; published online March 12.  
582 <https://www.nytimes.com/2020/03/12/world/europe/12italy-coronavirus-health-care.html>  
583 (accessed April 6, 2020).
- 584 53 Corbet S, Charlton A. Coronavirus: France holds critical COVID-19 patients in trains to  
585 relieve hospitals. *Glob. News*. 2020; published online April 5.  
586 <https://globalnews.ca/news/6781481/france-uses-trains-coronavirus-patients/> (accessed April  
587 6, 2020).
- 588 54 Coronavirus: Madrid conference centre becomes temporary hospital. *D Espana* 2020;  
589 published online March 22. [https://en.as.com/en/2020/03/22/album/1584882887\\_210391.html](https://en.as.com/en/2020/03/22/album/1584882887_210391.html)  
590 (accessed April 6, 2020).
- 591 55 Institute for Health Metrics and Evaluation. COVID-19 estimation updates.  
592 <http://www.healthdata.org/covid/updates>.
- 593 56 Institute for Health Metrics and Evaluation. COVID-19 Projections.  
594 <https://covid19.healthdata.org/> (accessed April 20, 2020).
- 595 57 Kliff S, Bosman J. Official counts understate the U.S. coronavirus death toll. *N. Y. Times*.  
596 2020; published online April 5. [https://www.nytimes.com/2020/04/05/us/coronavirus-deaths-](https://www.nytimes.com/2020/04/05/us/coronavirus-deaths-undercount.html)  
597 [undercount.html](https://www.nytimes.com/2020/04/05/us/coronavirus-deaths-undercount.html) (accessed April 20, 2020).
- 598 58 Badshah N. UK care homes body estimates 4,000 residents died from coronavirus. *The*  
599 *Guardian*. 2020; published online April 19.  
600 [https://www.theguardian.com/society/2020/apr/19/care-homes-body-says-4000-residents-](https://www.theguardian.com/society/2020/apr/19/care-homes-body-says-4000-residents-may-died-have-from-coronavirus)  
601 [may-died-have-from-coronavirus](https://www.theguardian.com/society/2020/apr/19/care-homes-body-says-4000-residents-may-died-have-from-coronavirus) (accessed April 20, 2020).

602



Figure 2. Death rate data age-standardized to California as a function of time since a threshold death rate of 0.3 per million.

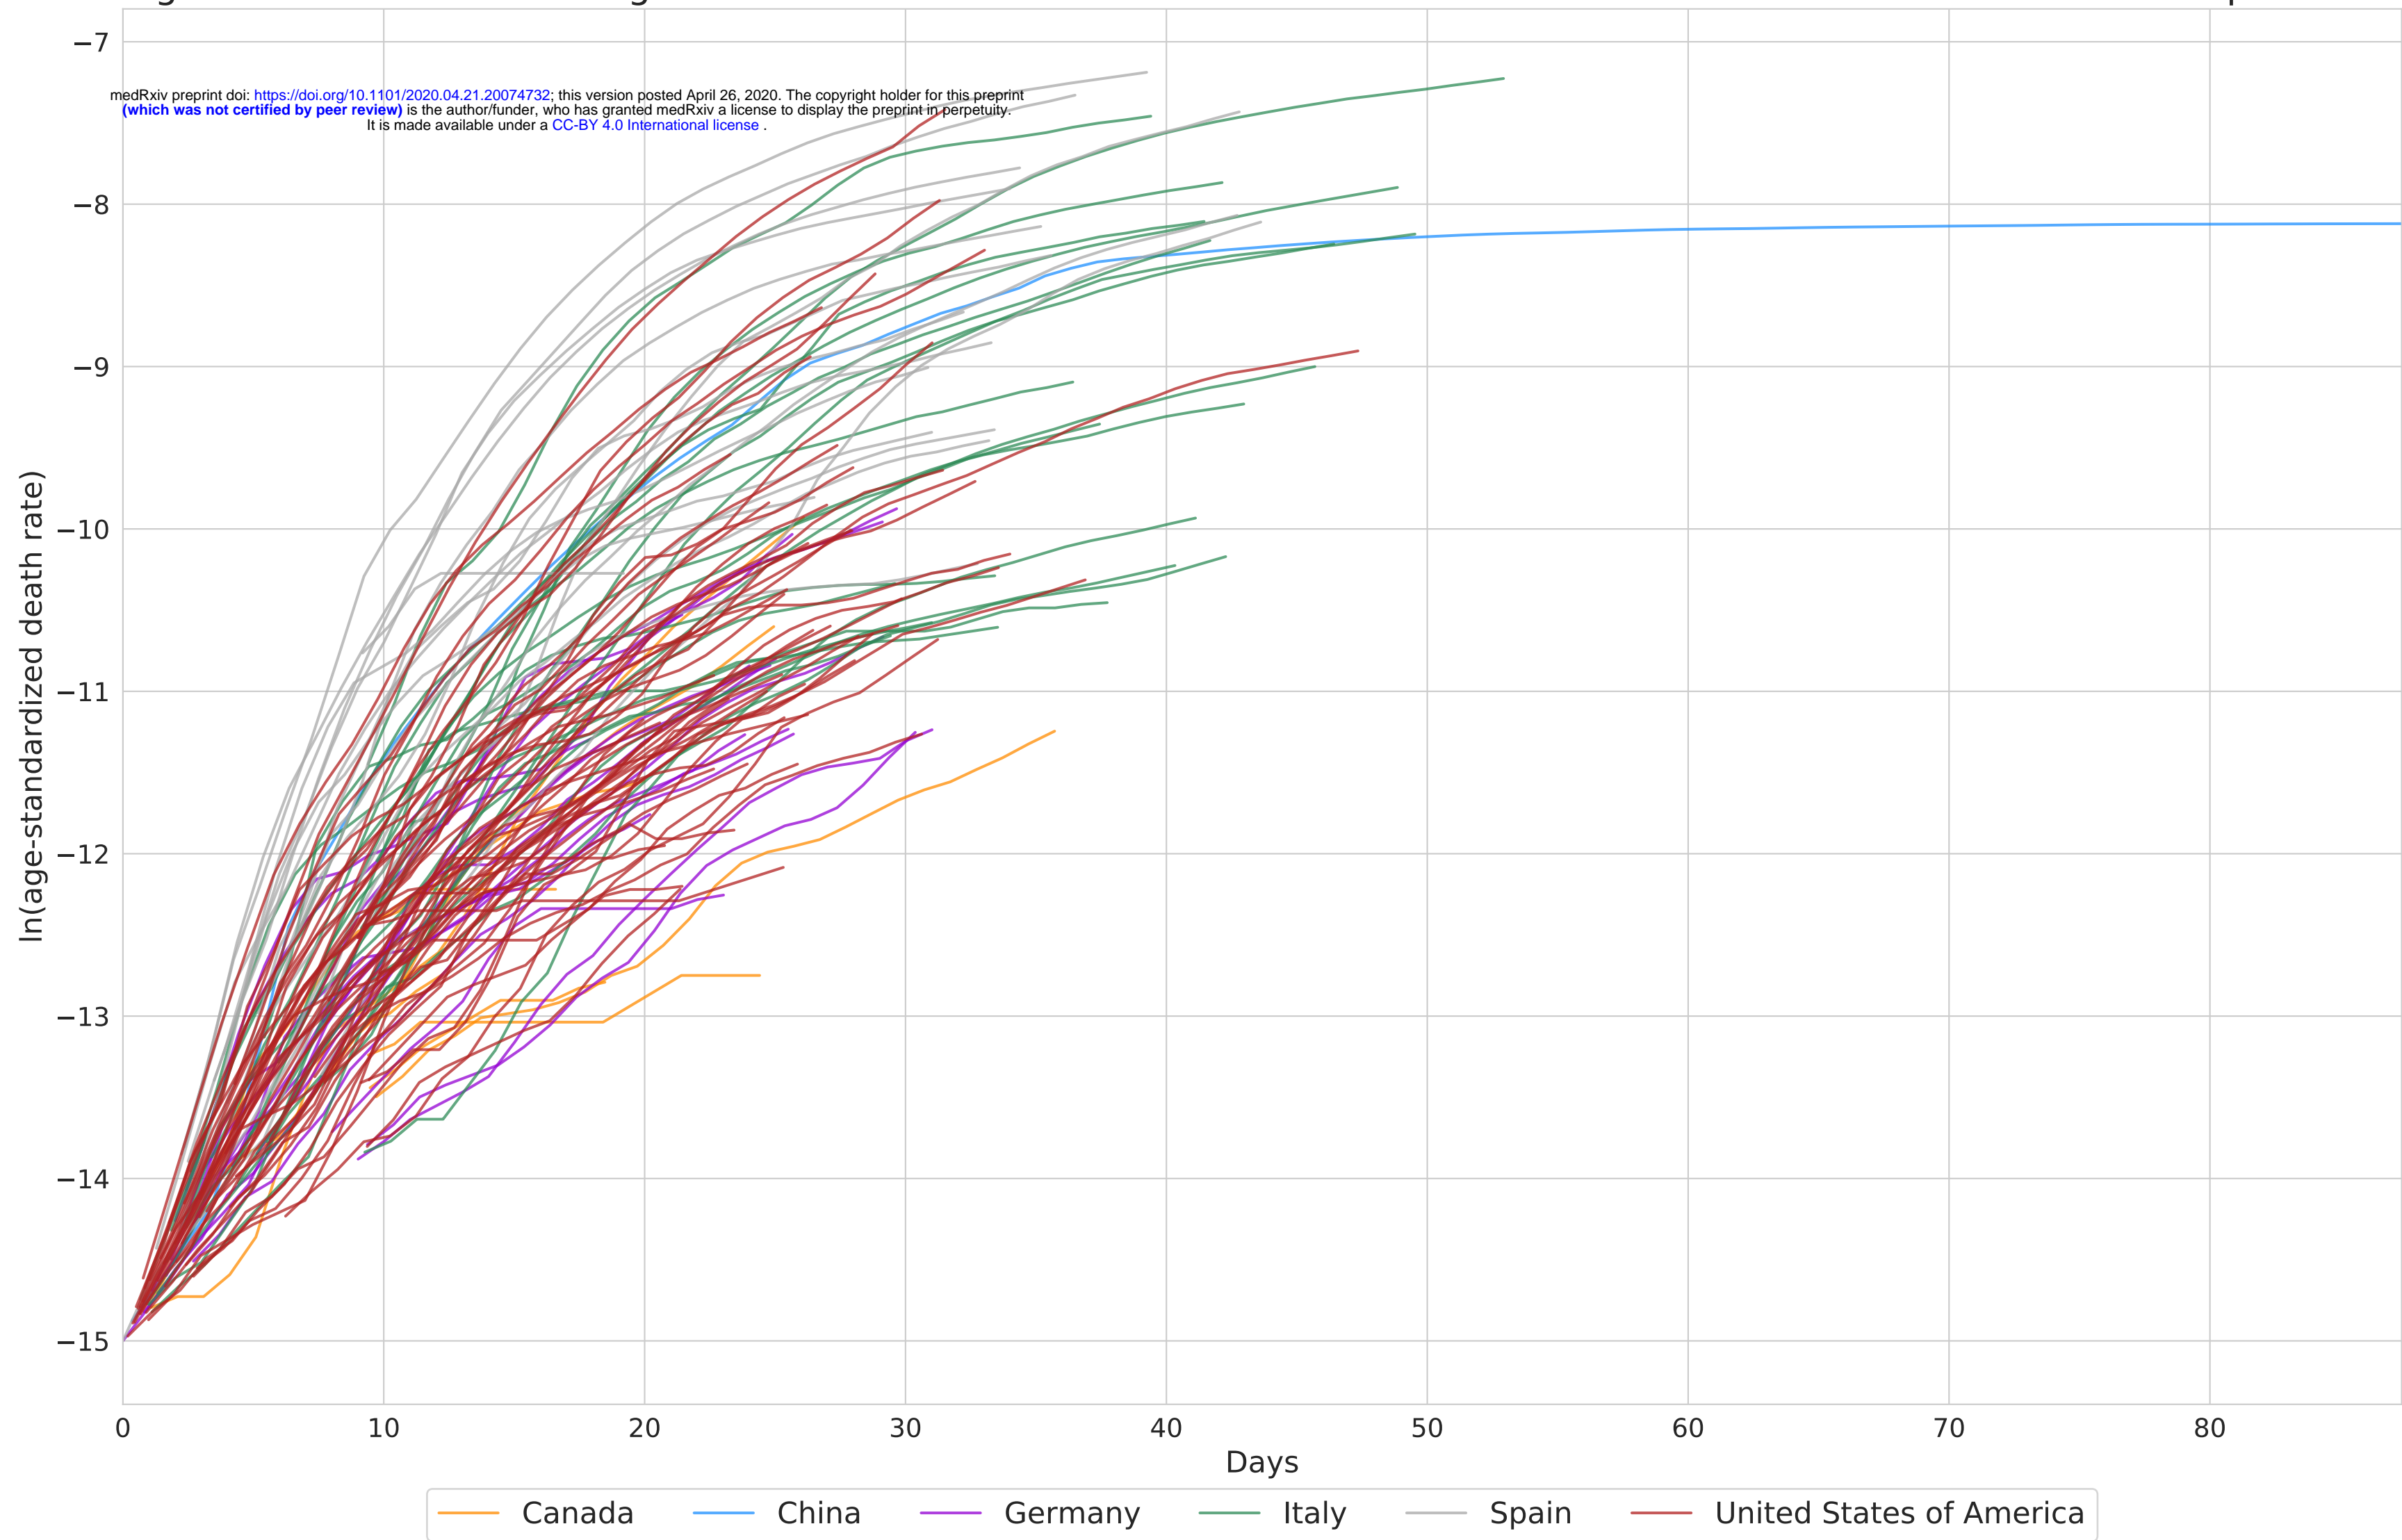



Figure 3A - USA

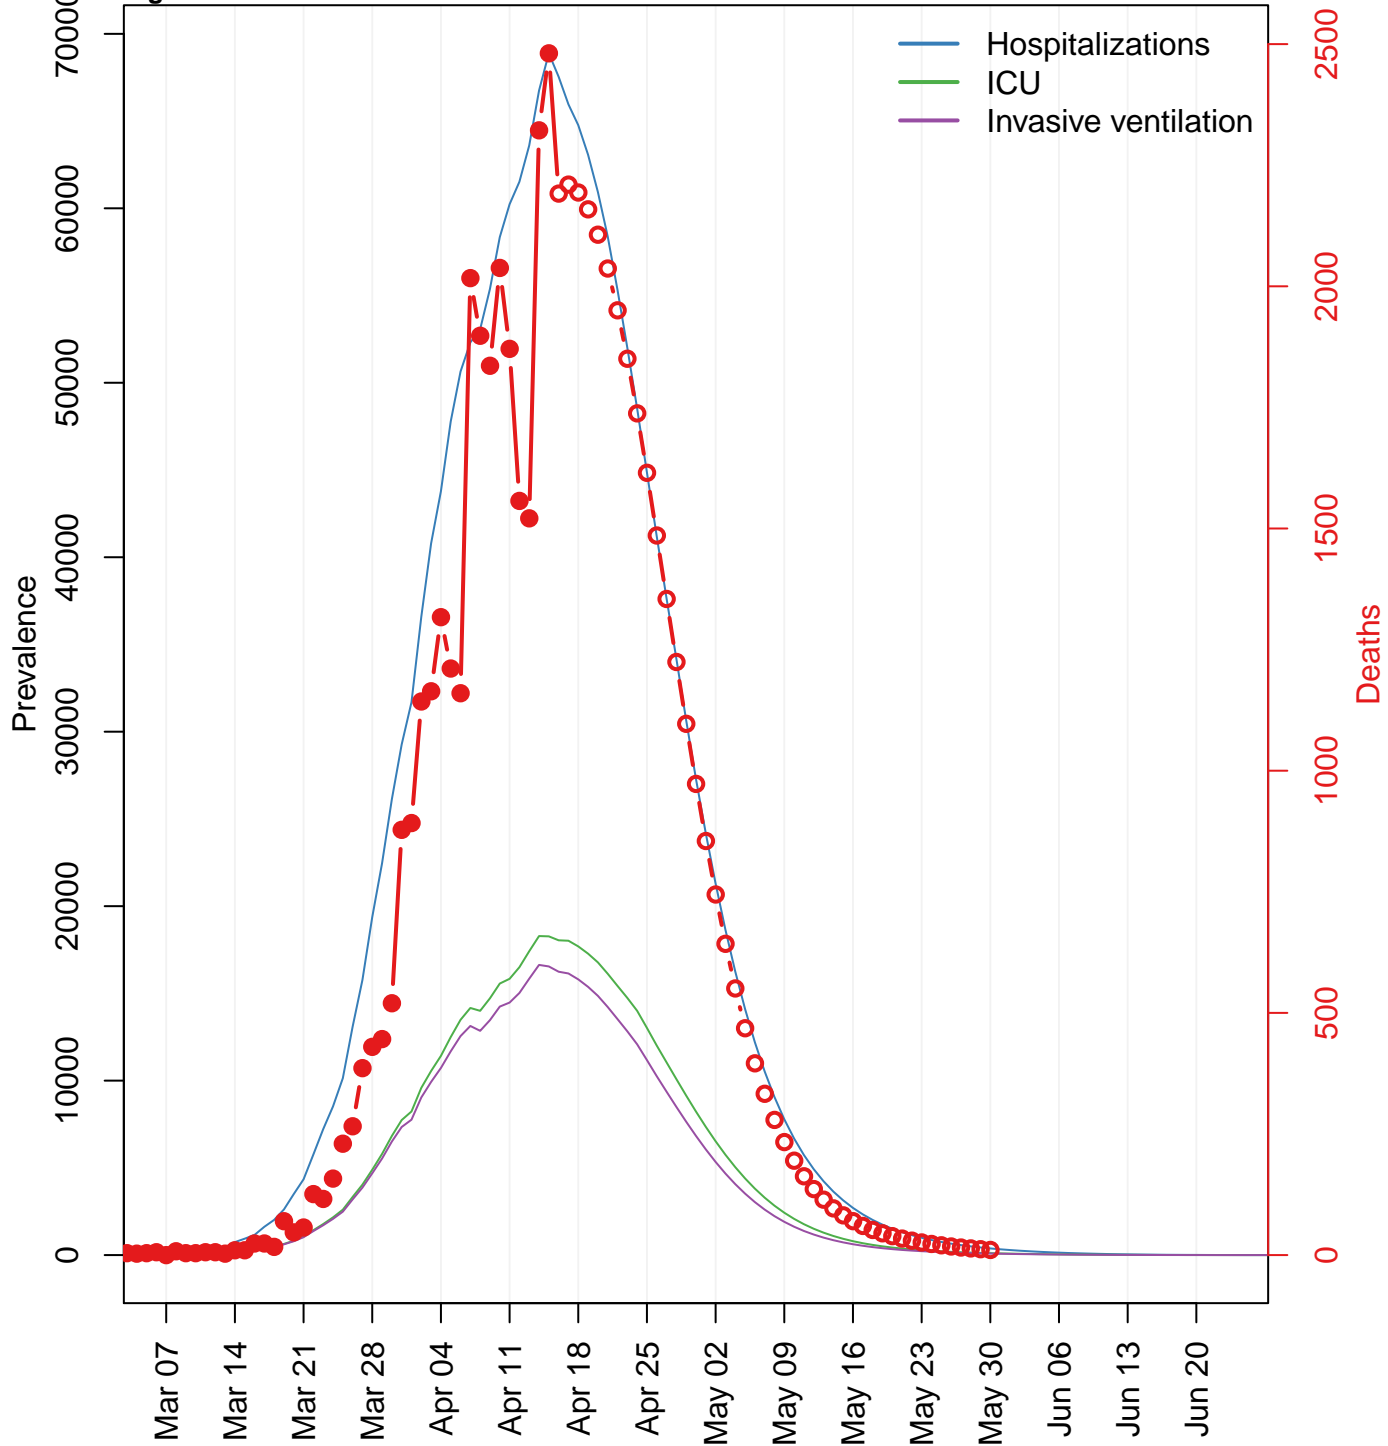

Figure 3B - EEA

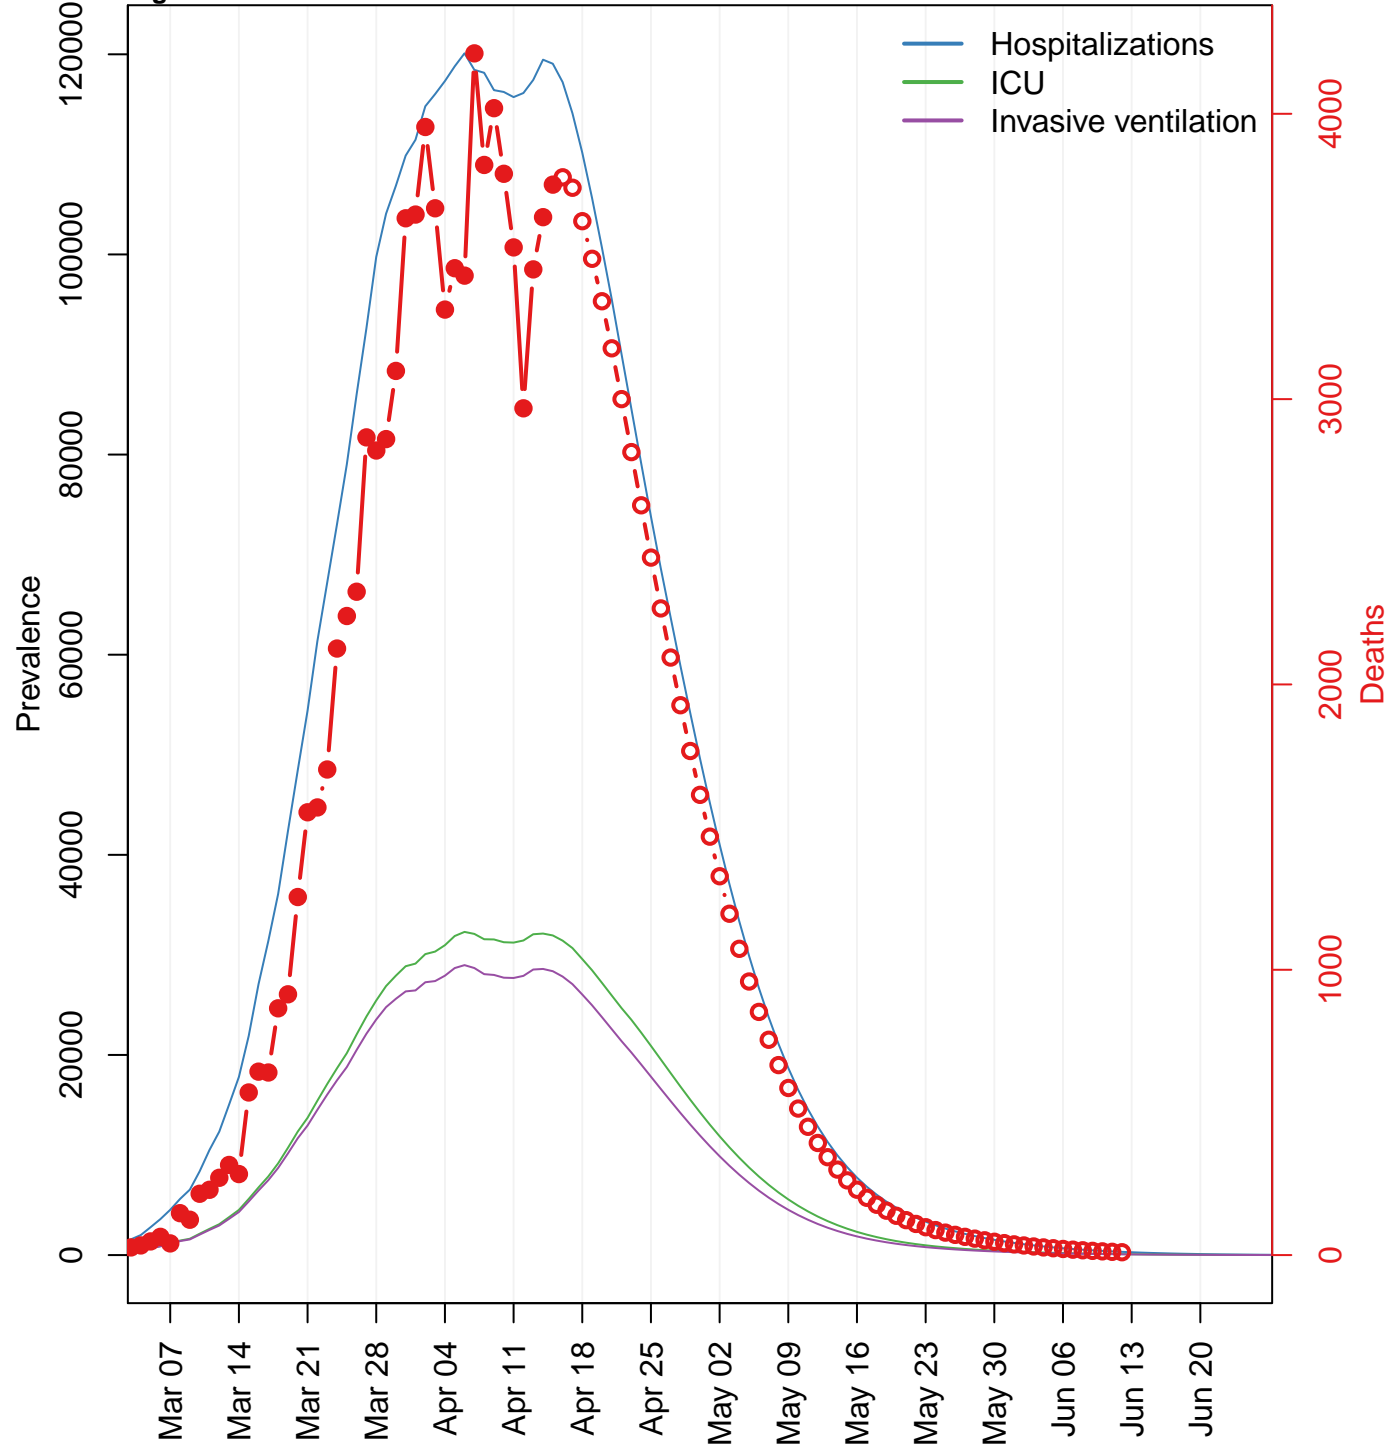

Figure 4. Date of peak of daily deaths by state

A. United States

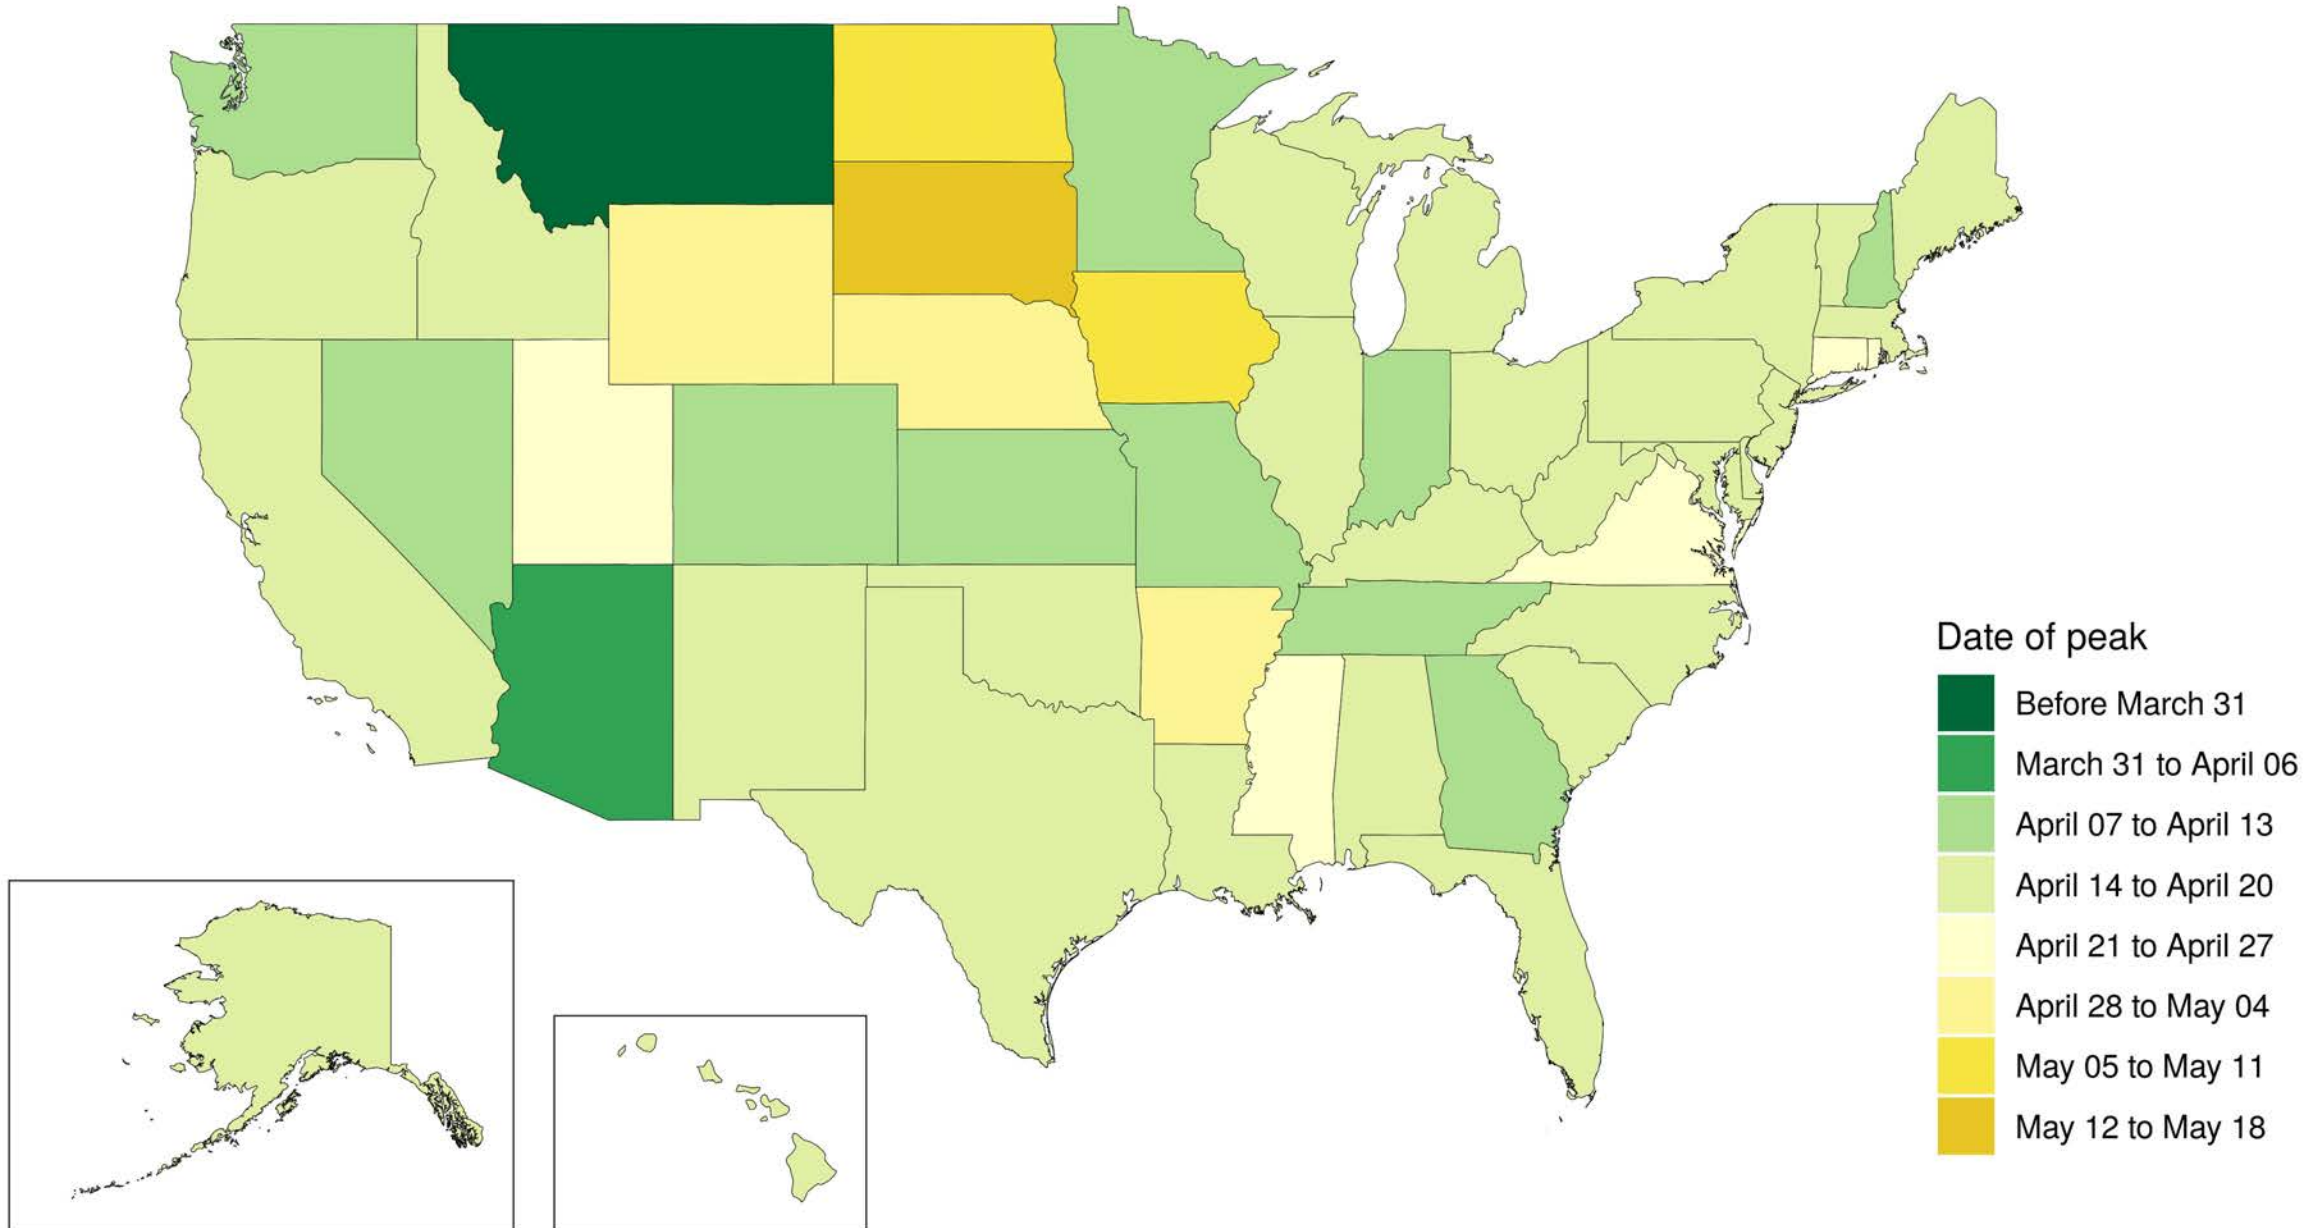

Figure 4. Date of peak of daily deaths by location  
B. European Economic Area

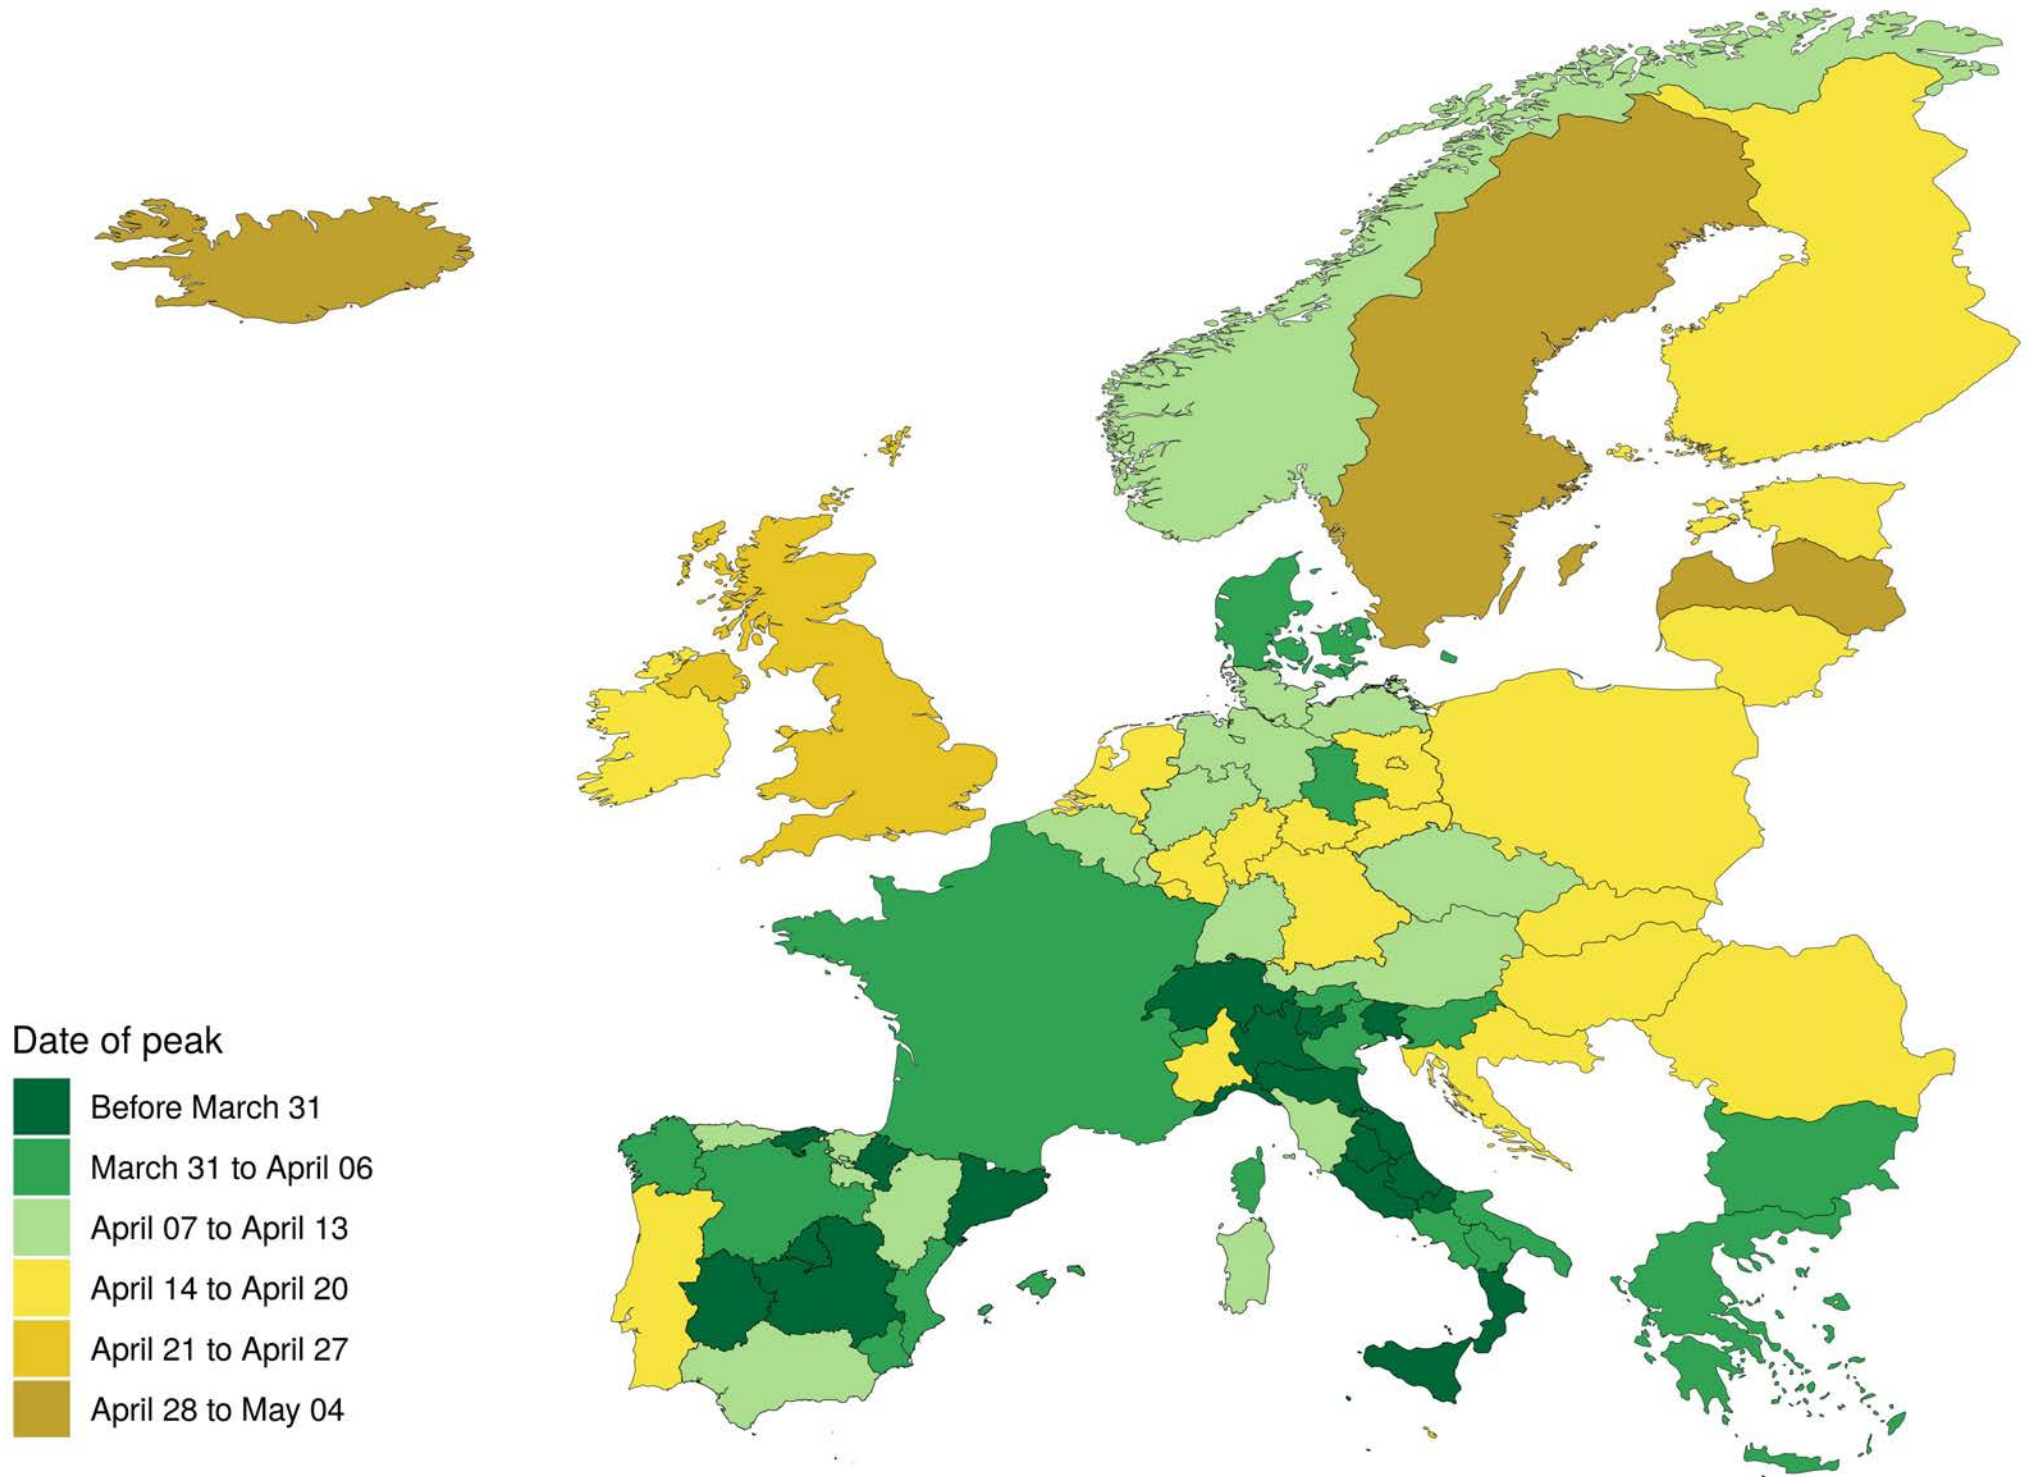

Figure 5A - USA

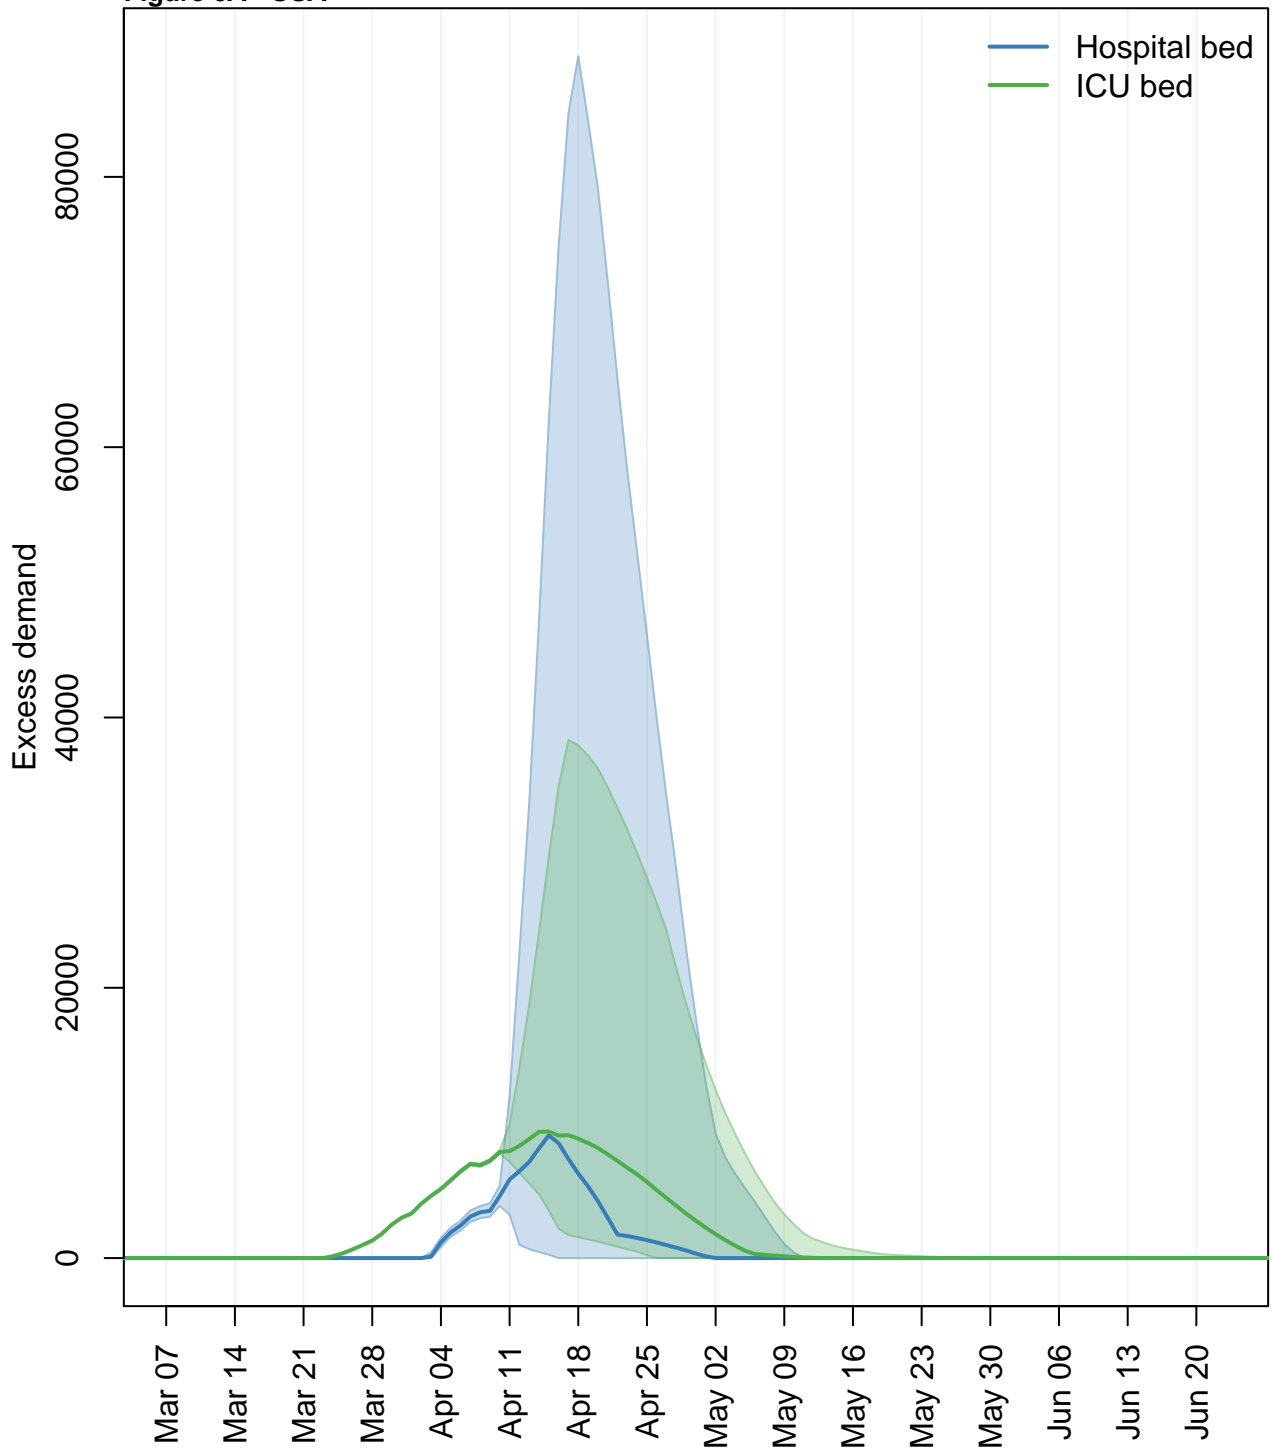



Figure 5B - EEA

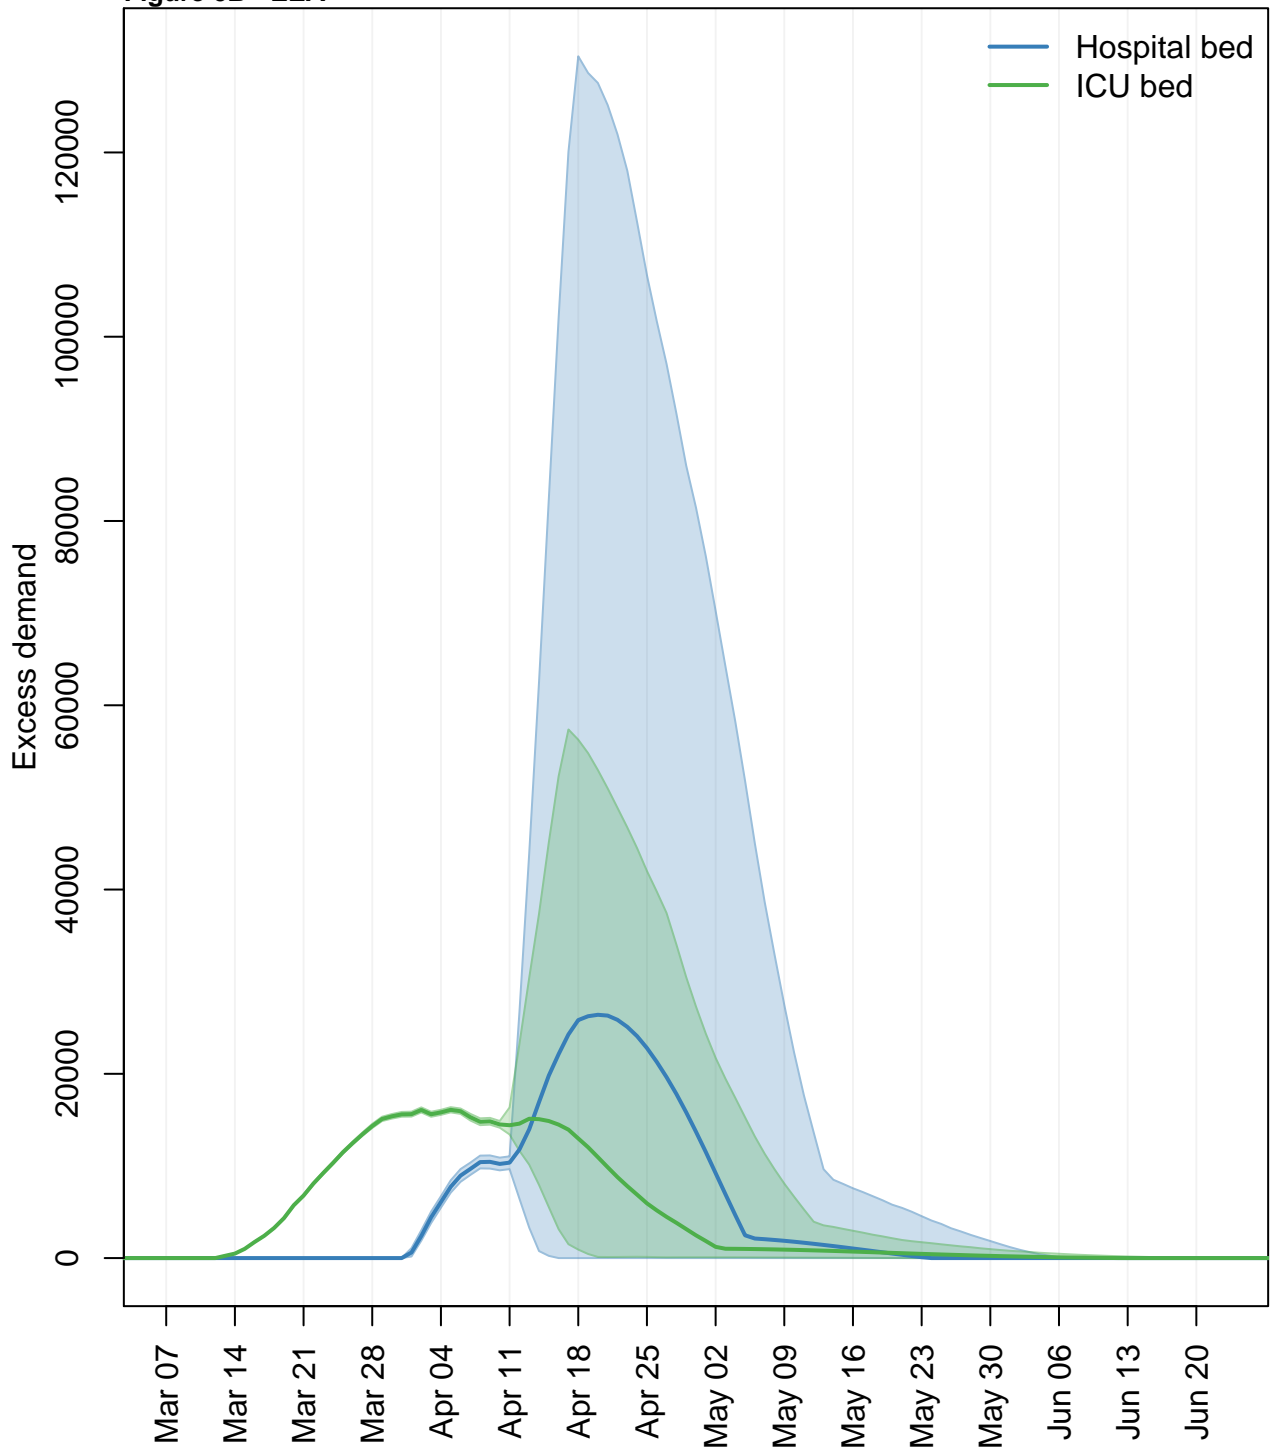

Figure 6A. United States

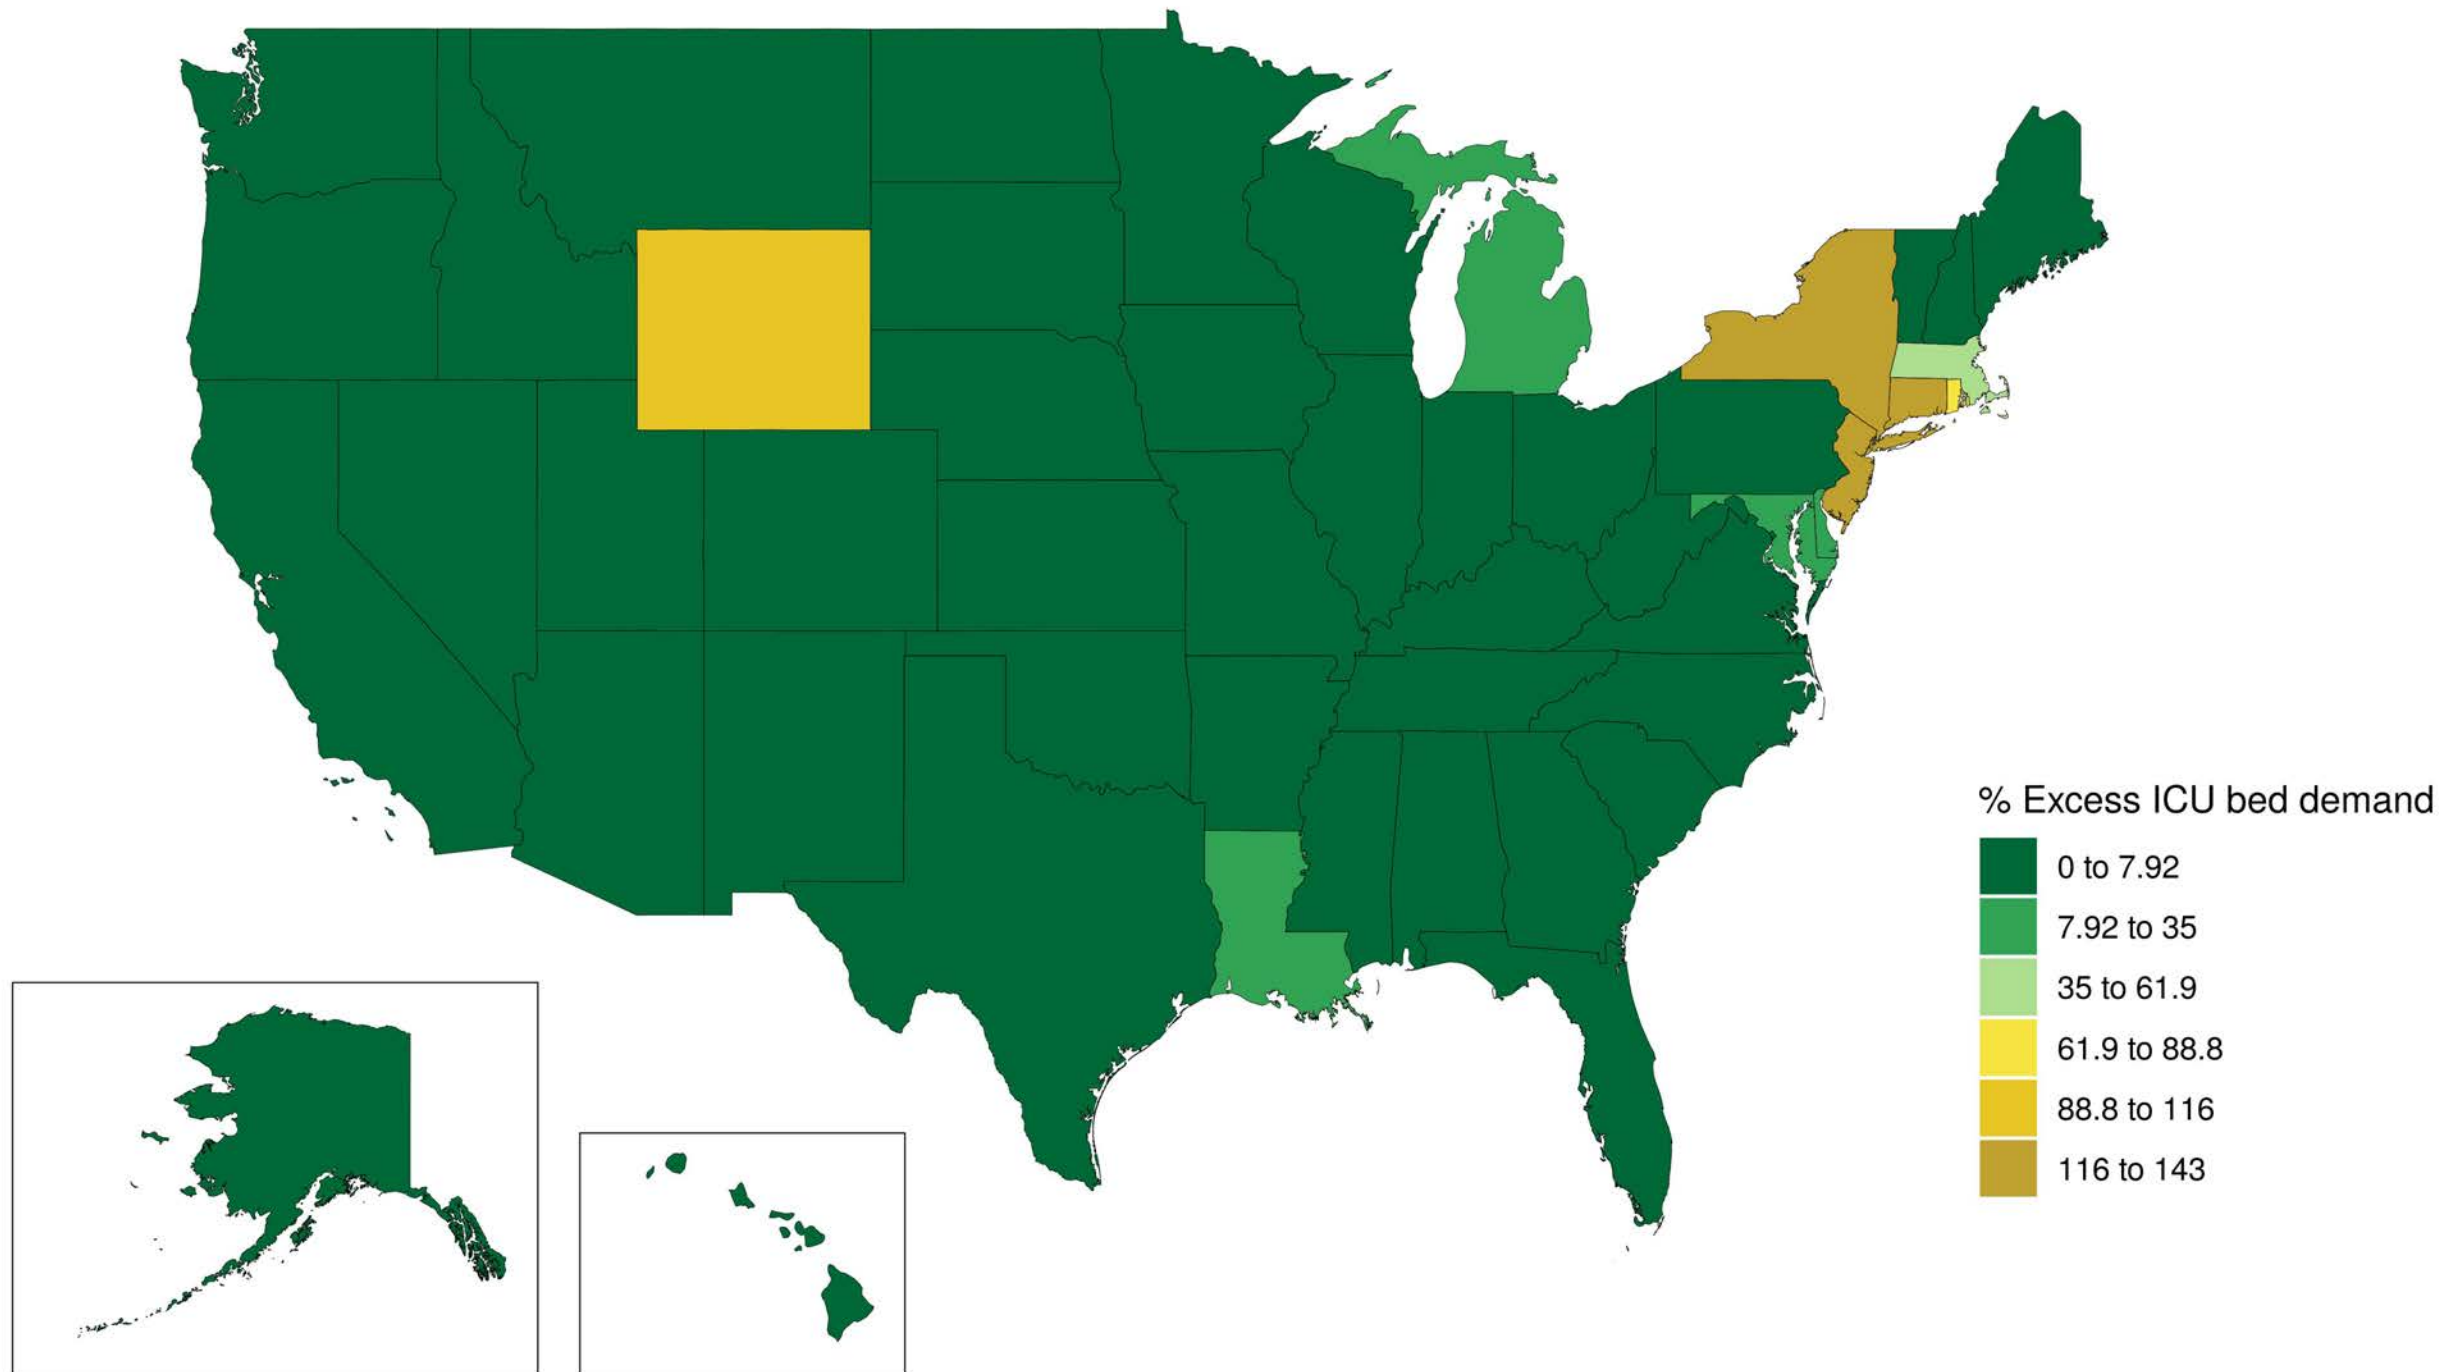

Figure 6B. European Economic Area

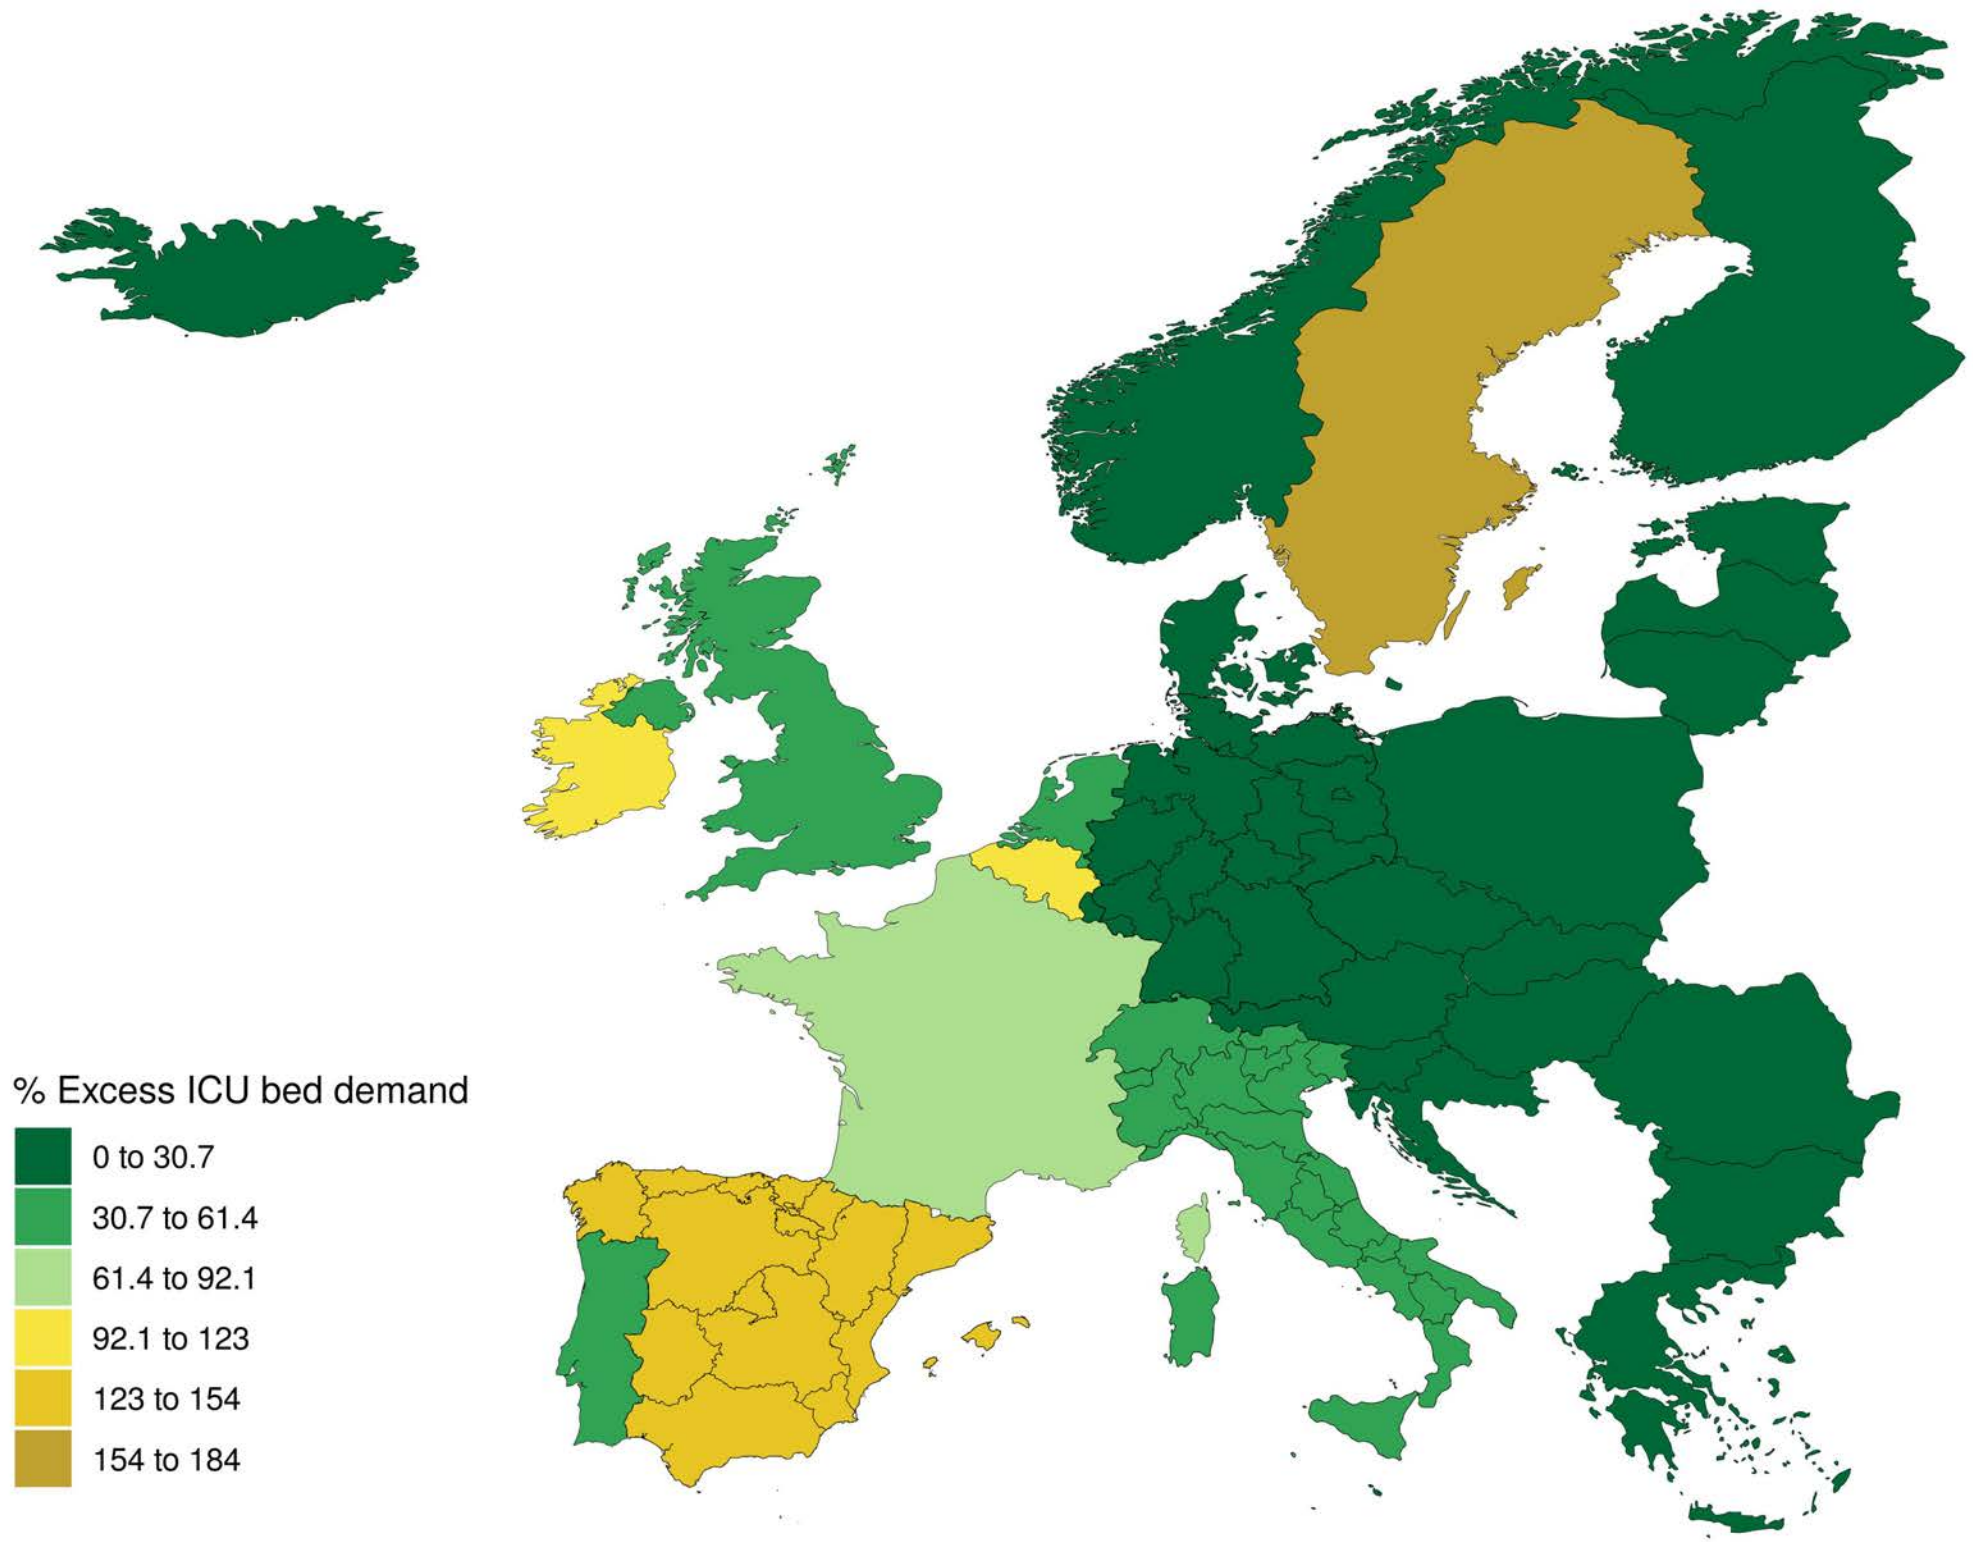

Figure 7A -- USA

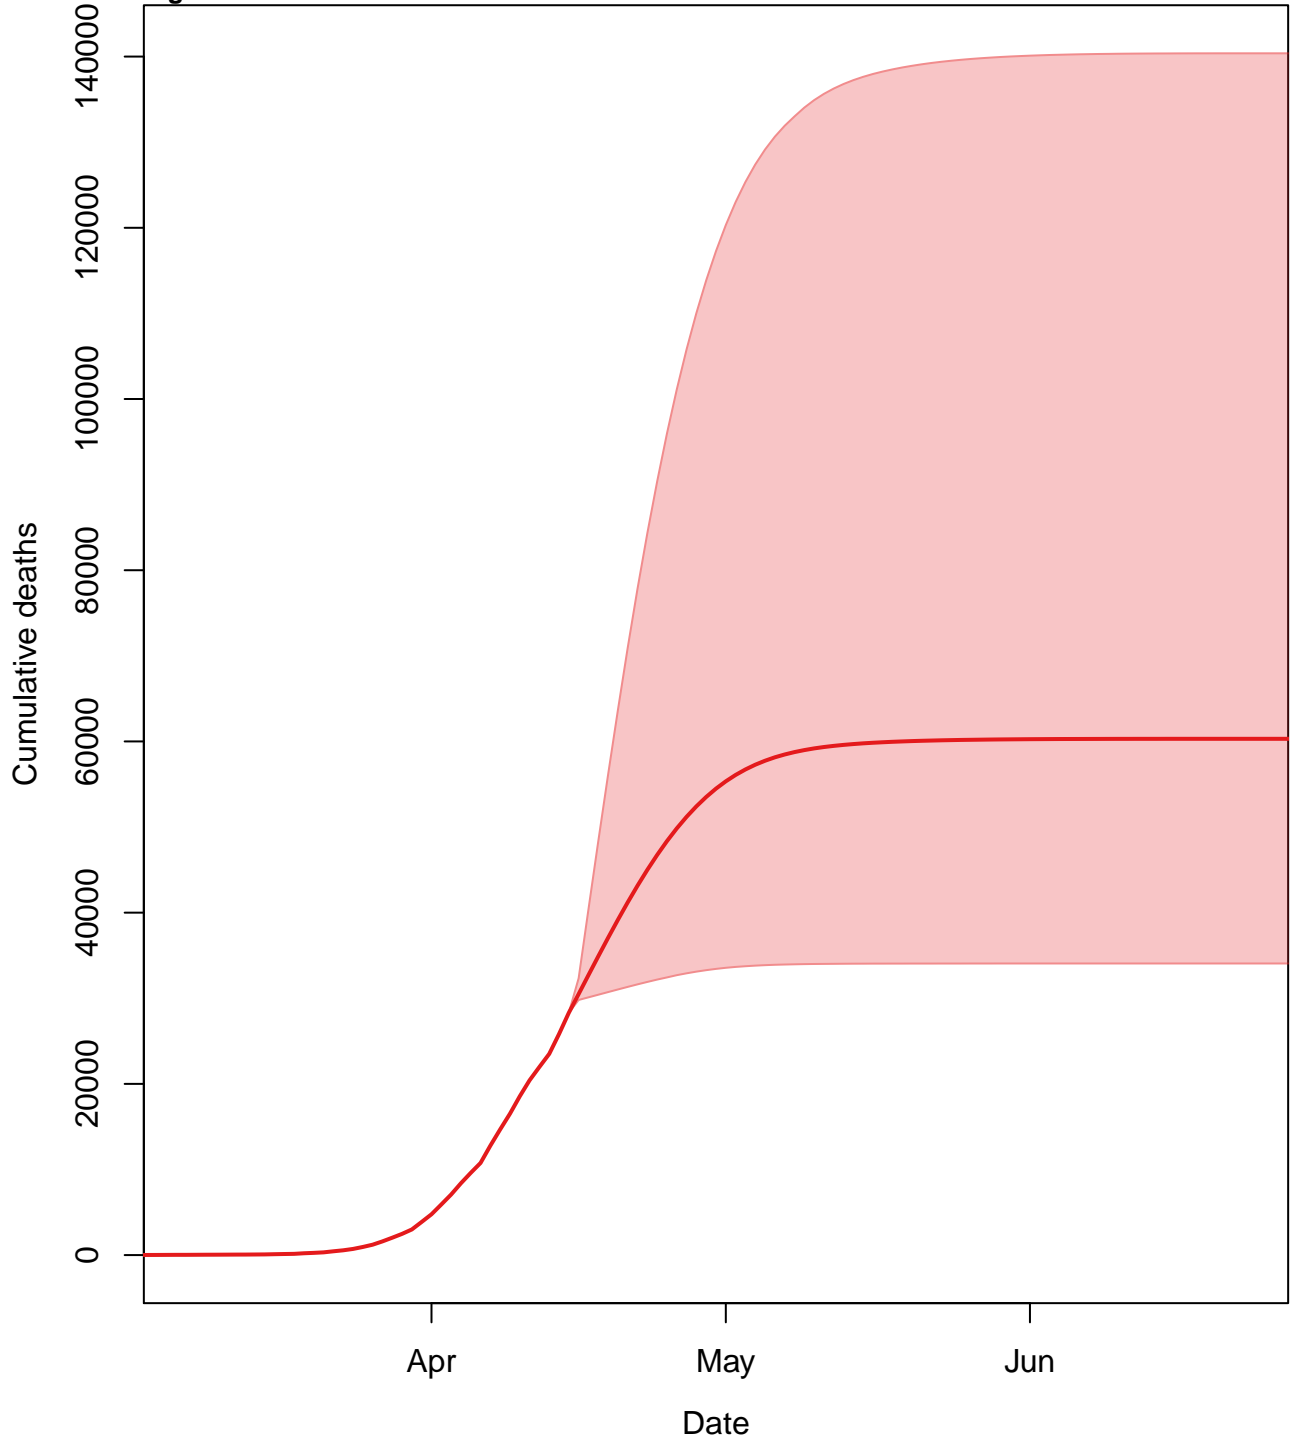

Figure 7B - EEA

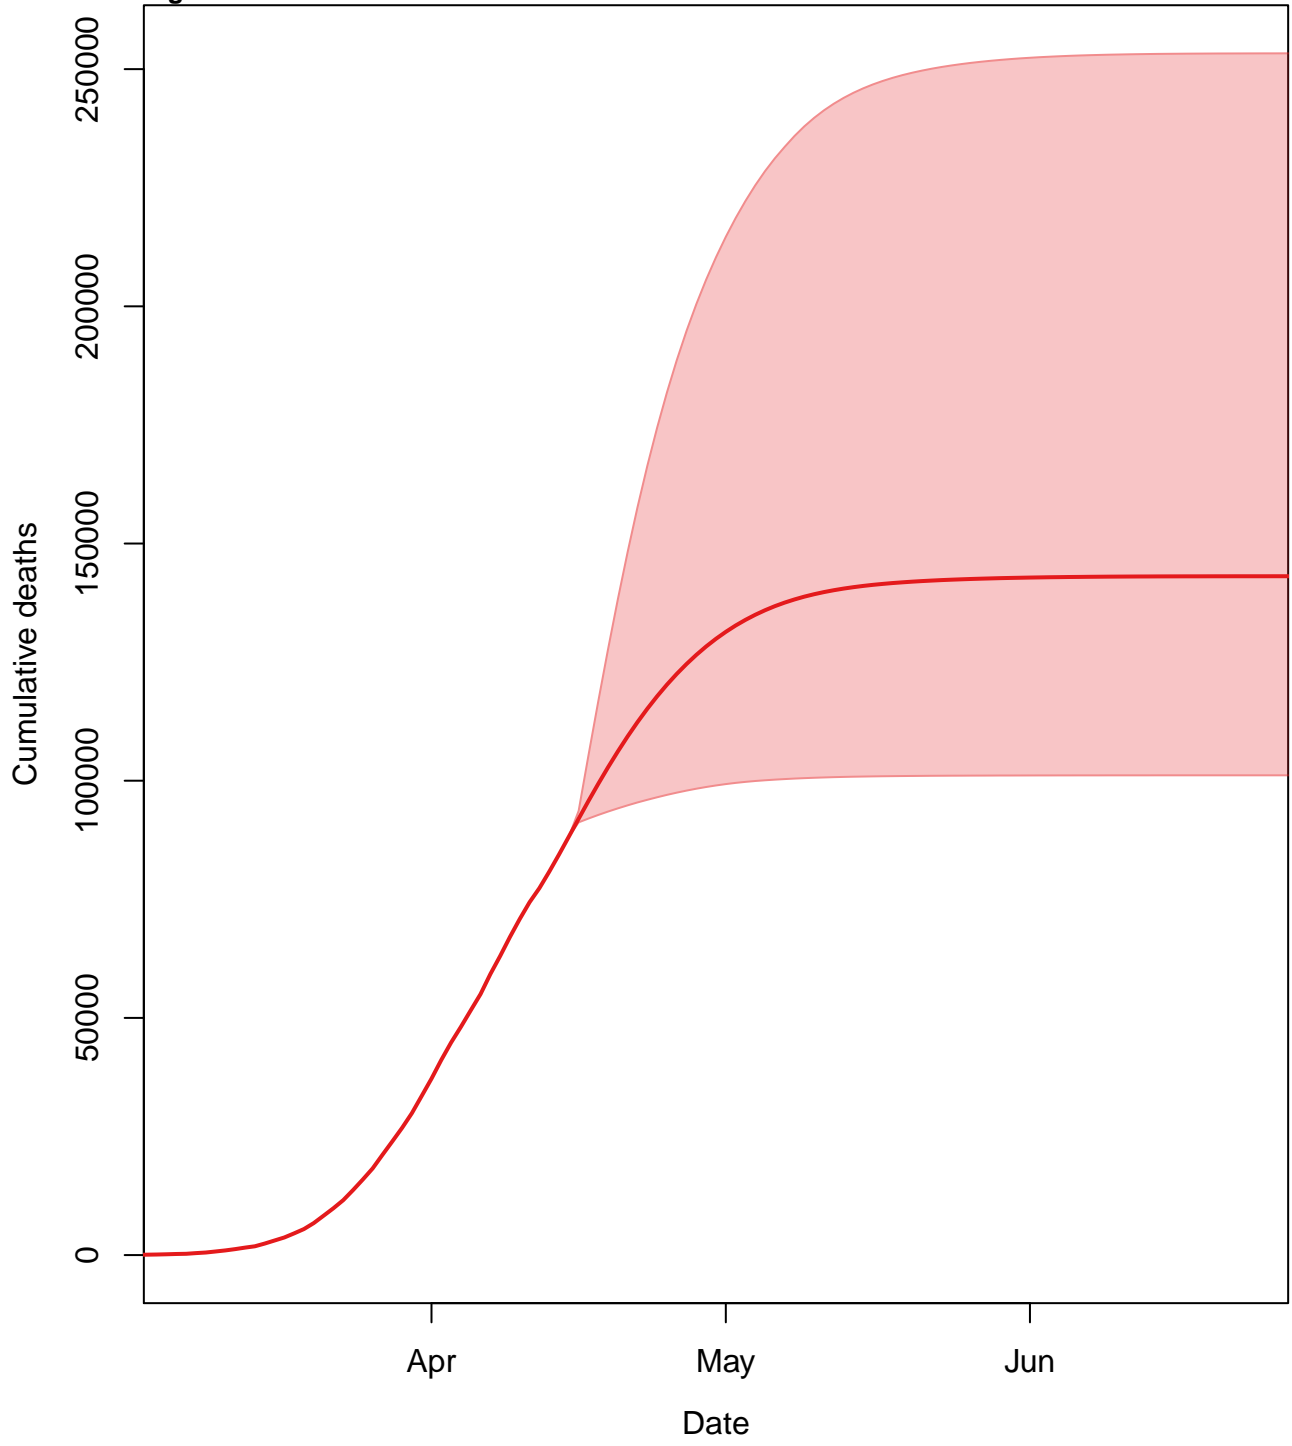





Figure 8. Expected mean cumulative death per 100,000 population  
B. European Economic Area

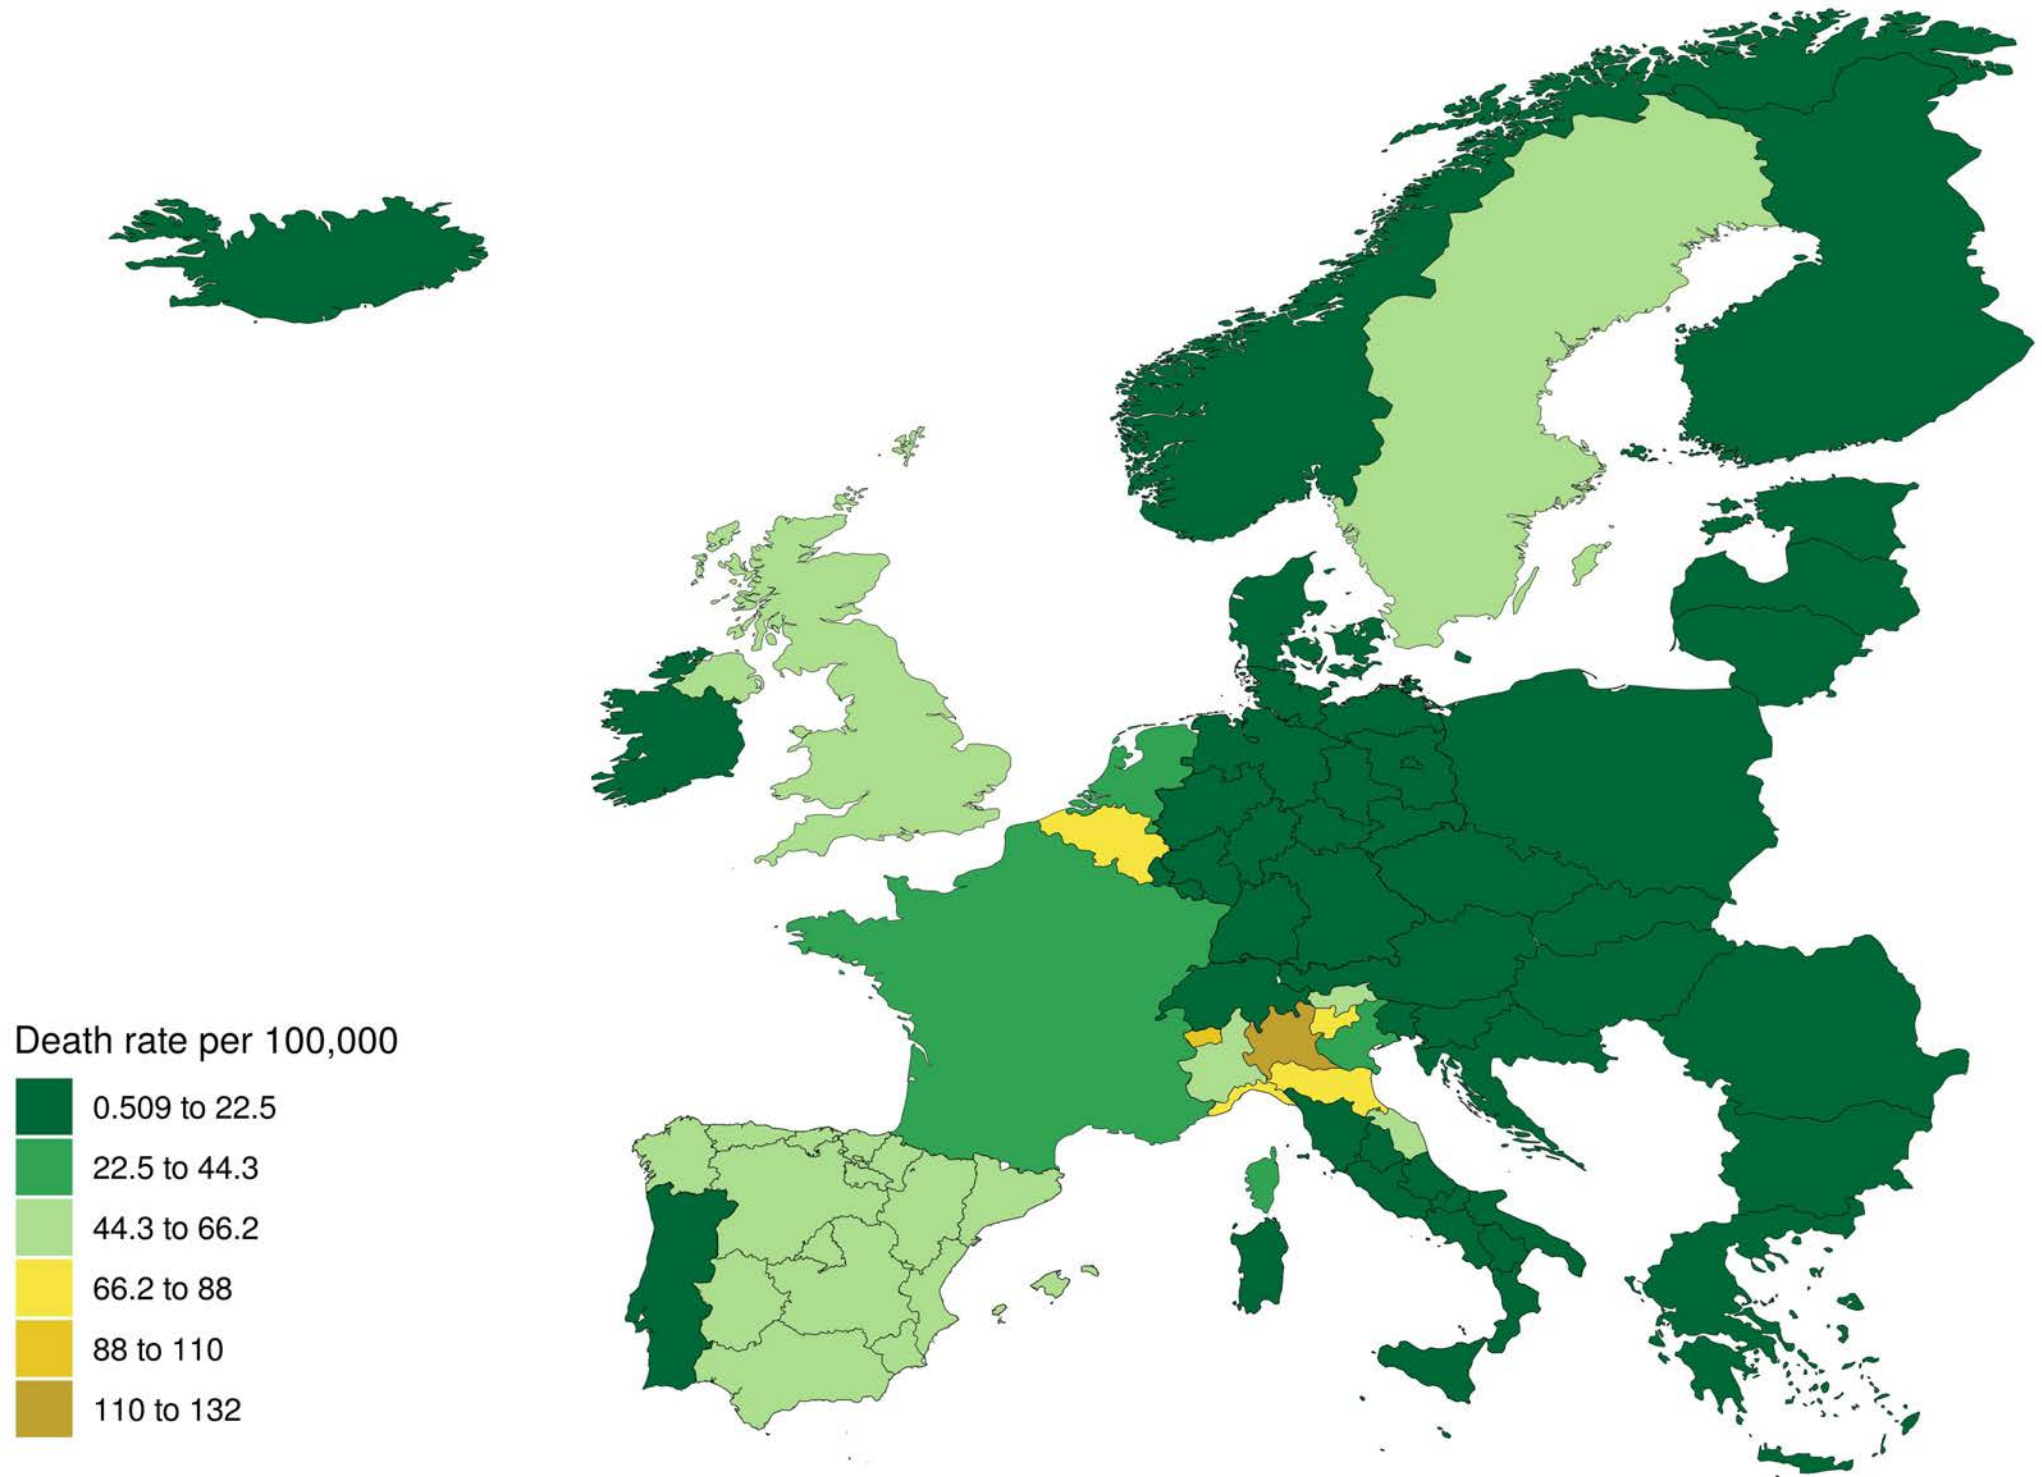

Figure 9A -- USA

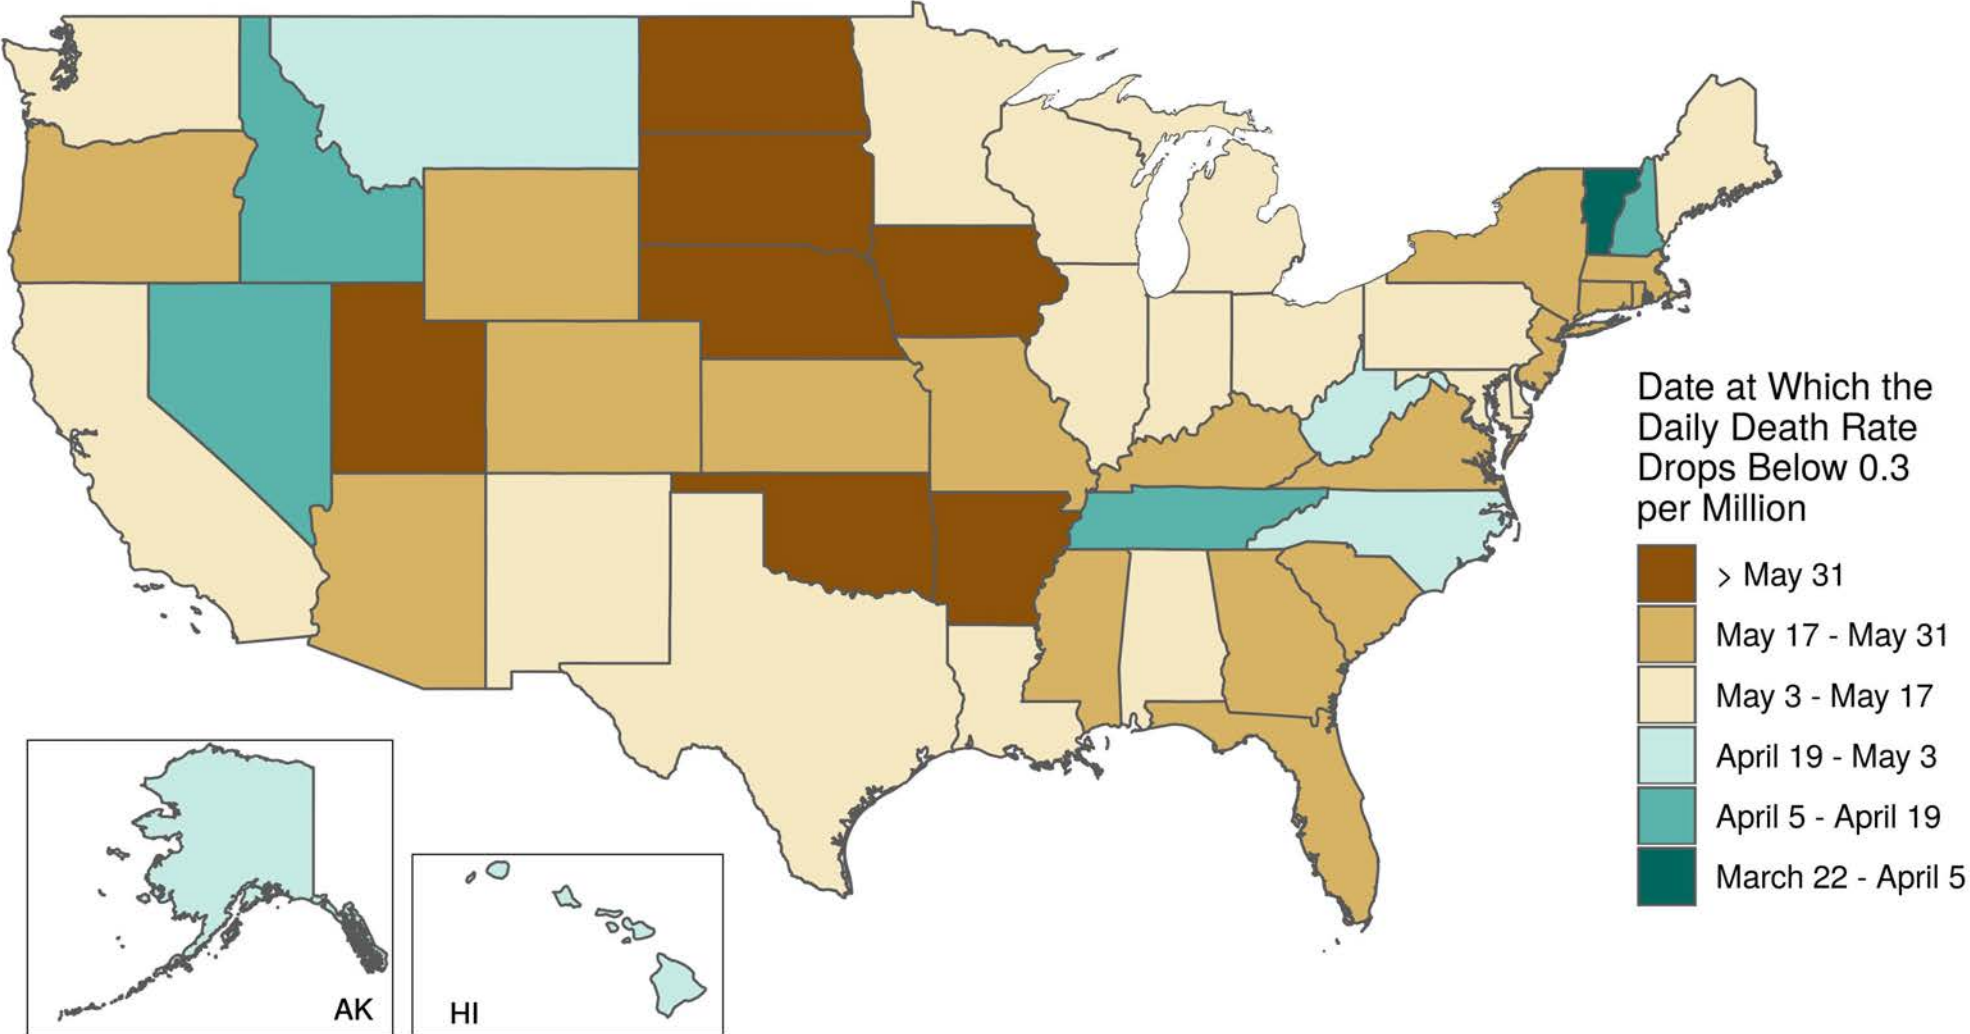

Figure 9B-- EEA

Date at Which the  
Daily Death Rate  
Drops Below 0.3  
per Million

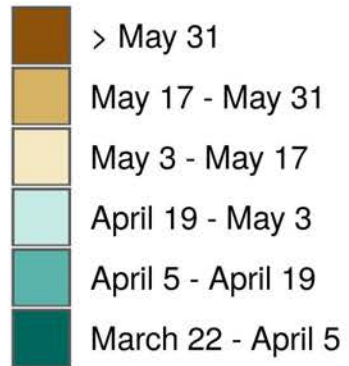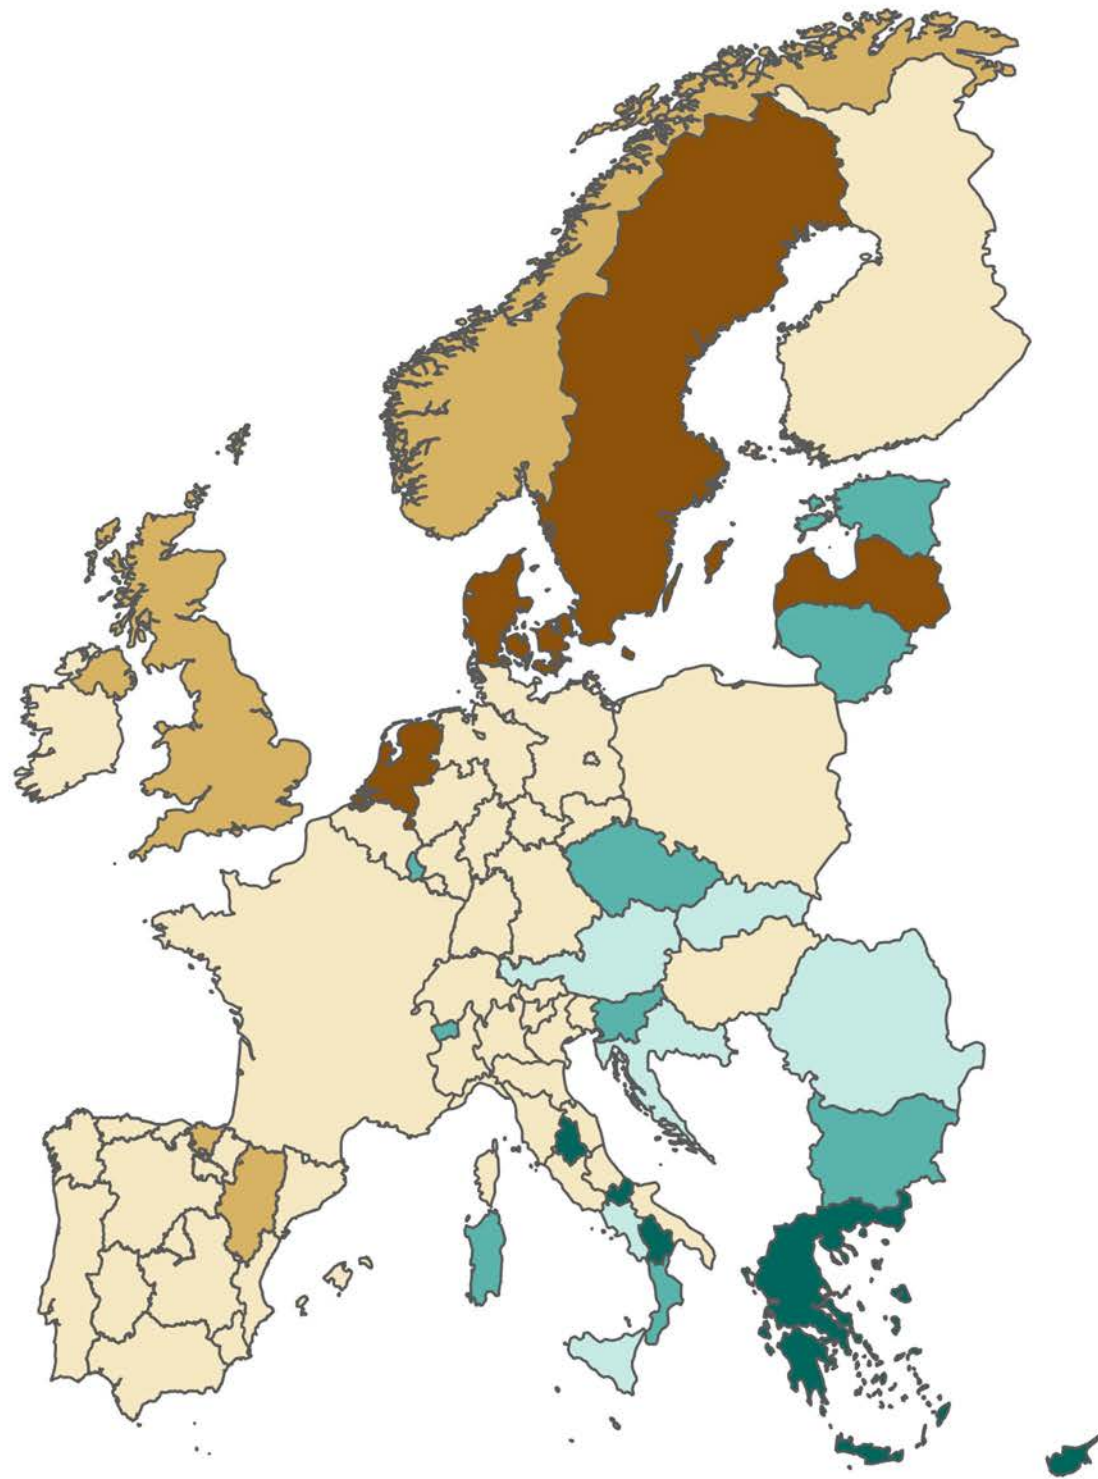



Table 1. Summary information on deaths, peak demand, peak excess demand, and aggregate demand, by location

| Location name                 | Cumulative Deaths   | Date of Peak Hospital use          | Beds Used at Peak   | ICU Beds Used at Peak | Ventilators Used at Peak | Excess Bed Demand | Excess ICU Demand | Cumulative Bed Days   | Cumulative ICU Days    | Cumulative Ventilator Days |
|-------------------------------|---------------------|------------------------------------|---------------------|-----------------------|--------------------------|-------------------|-------------------|-----------------------|------------------------|----------------------------|
| Austria                       | 457 (414–593)       | 04/06/2020 (04/06/2020–04/17/2020) | 703 (679–801)       | 183 (179–220)         | 165 (163–197)            | 0 (0–0)           | 0 (0–0)           | 703 (13321–20478)     | 4062 (3608–5343)       | 3600 (3204–4719)           |
| Belgium                       | 8039 (5416–15180)   | 04/11/2020 (04/11/2020–04/18/2020) | 10321 (9994–27826)  | 2730 (2544–7094)      | 2432 (2320–6603)         | 0 (0–1078)        | 1931 (1746–6295)  | 10321 (171751–506232) | 70826 (47069–134970)   | 62930 (41880–119972)       |
| Bulgaria                      | 47 (38–86)          | 04/12/2020 (04/11/2020–04/17/2020) | 70 (61–187)         | 19 (17–47)            | 17 (16–44)               | 0 (0–0)           | 0 (0–0)           | 70 (1138–3134)        | 425 (315–800)          | 376 (281–699)              |
| Croatia                       | 56 (35–114)         | 04/14/2020 (04/12/2020–04/18/2020) | 97 (64–280)         | 25 (19–68)            | 23 (17–64)               | 0 (0–0)           | 0 (0–0)           | 97 (1044–4082)        | 498 (294–1052)         | 442 (262–923)              |
| Cyprus                        | 18 (14–33)          | 03/28/2020 (03/28/2020–04/18/2020) | 37 (30–83)          | 8 (8–19)              | 8 (7–17)                 | 0 (0–0)           | 0 (0–0)           | 37 (446–1528)         | 169 (116–344)          | 146 (103–298)              |
| Czechia                       | 194 (170–274)       | 04/09/2020 (04/09/2020–04/15/2020) | 358 (340–535)       | 89 (86–136)           | 79 (78–123)              | 0 (0–0)           | 0 (0–0)           | 358 (5711–10170)      | 1766 (1508–2541)       | 1555 (1333–2228)           |
| Denmark                       | 683 (354–1637)      | 04/18/2020 (04/04/2020–04/18/2020) | 549 (520–1885)      | 139 (131–438)         | 124 (119–405)            | 0 (0–0)           | 47 (39–346)       | 549 (11663–58026)     | 6155 (3103–14980)      | 5436 (2744–13196)          |
| Estonia                       | 57 (36–135)         | 04/03/2020 (04/03/2020–04/18/2020) | 79 (70–211)         | 20 (18–50)            | 18 (17–48)               | 0 (0–0)           | 0 (0–9)           | 79 (1034–4639)        | 501 (297–1214)         | 445 (266–1076)             |
| Finland                       | 118 (76–257)        | 04/13/2020 (04/11/2020–04/18/2020) | 150 (137–400)       | 40 (38–102)           | 37 (35–94)               | 0 (0–0)           | 0 (0–41)          | 150 (2278–8531)       | 1043 (644–2279)        | 926 (576–2019)             |
| France                        | 22555 (19455–29314) | 04/02/2020 (04/02/2020–04/16/2020) | 25795 (25297–32686) | 6975 (6907–8803)      | 6266 (6213–7968)         | 0 (0–0)           | 5214 (5146–7042)  | 25795 (612478–957724) | 197059 (168591–258463) | 175462 (150150–229655)     |
| Germany                       | 4957 (3697–9379)    | 04/11/2020 (04/11/2020–04/17/2020) | 6322 (6241–16734)   | 1778 (1637–4432)      | 1596 (1481–4130)         | 0 (0–0)           | 0 (0–0)           | 6322 (114421–296138)  | 42929 (31823–81389)    | 38317 (28433–72531)        |
| Bavaria                       | 1809 (1760–4998)    | 04/11/2020 (04/11/2020–04/17/2020) | 1809 (1760–4998)    | 514 (473–1322)        | 461 (428–1236)           | 0 (0–0)           | 0 (0–0)           | 1809 (33175–87392)    | 12393 (9306–23942)     | 11062 (8328–21320)         |
| Berlin                        | 159 (81–455)        | 04/16/2020 (04/11/2020–04/18/2020) | 260 (147–1023)      | 69 (38–259)           | 64 (36–245)              | 0 (0–0)           | 0 (0–0)           | 260 (2327–14389)      | 1374 (670–3984)        | 1226 (603–3521)            |
| Brandenburg                   | 70 (54–126)         | 04/15/2020 (04/05/2020–04/17/2020) | 119 (108–313)       | 34 (28–80)            | 31 (27–76)               | 0 (0–0)           | 0 (0–0)           | 119 (1535–4141)       | 604 (447–1104)         | 539 (401–983)              |
| Bremen                        | 26 (21–50)          | 04/09/2020 (04/09/2020–04/18/2020) | 48 (42–95)          | 13 (12–26)            | 12 (11–24)               | 0 (0–0)           | 0 (0–0)           | 48 (553–1654)         | 230 (165–445)          | 205 (149–394)              |
| Hamburg                       | 139 (84–321)        | 04/16/2020 (04/06/2020–04/18/2020) | 217 (159–606)       | 60 (45–156)           | 55 (42–146)              | 0 (0–0)           | 0 (0–0)           | 217 (2433–10064)      | 1205 (700–2751)        | 1075 (629–2447)            |
| Hesse                         | 290 (196–644)       | 04/14/2020 (04/11/2020–04/18/2020) | 423 (360–1221)      | 117 (98–315)          | 106 (90–295)             | 0 (0–0)           | 0 (0–0)           | 423 (5809–20528)      | 2515 (1652–5607)       | 2245 (1481–4988)           |
| Lower Saxony                  | 326 (253–569)       | 04/11/2020 (04/11/2020–04/17/2020) | 461 (441–974)       | 124 (121–257)         | 114 (112–235)            | 0 (0–0)           | 0 (0–0)           | 461 (7553–18495)      | 2820 (2142–5025)       | 2517 (1917–4454)           |
| Mecklenburg–Vorpommern        | 17 (13–35)          | 04/03/2020 (04/03/2020–04/17/2020) | 35 (30–79)          | 9 (9–19)              | 9 (8–18)                 | 0 (0–0)           | 0 (0–0)           | 35 (330–1195)         | 151 (99–314)           | 135 (91–279)               |
| North Rhine–Westphalia        | 841 (692–1239)      | 04/11/2020 (04/11/2020–04/16/2020) | 1187 (1153–2098)    | 321 (306–552)         | 286 (281–512)            | 0 (0–0)           | 0 (0–0)           | 1187 (21113–39503)    | 7285 (5924–10804)      | 6501 (5294–9643)           |
| Rhineland–Palatinate          | 170 (93–498)        | 04/16/2020 (04/11/2020–04/18/2020) | 252 (153–1096)      | 67 (44–274)           | 61 (41–260)              | 0 (0–0)           | 0 (0–0)           | 252 (2680–15767)      | 1473 (774–4321)        | 1315 (695–3848)            |
| Saarland                      | 116 (71–267)        | 04/11/2020 (04/11/2020–04/17/2020) | 195 (181–484)       | 52 (41–122)           | 48 (39–114)              | 0 (0–0)           | 0 (0–0)           | 195 (2077–8513)       | 1006 (603–2312)        | 898 (540–2054)             |
| Saxony–Anhalt                 | 36 (27–74)          | 04/09/2020 (04/09/2020–04/18/2020) | 54 (47–166)         | 15 (14–45)            | 14 (13–42)               | 0 (0–0)           | 0 (0–0)           | 54 (716–2464)         | 315 (213–655)          | 281 (193–584)              |
| Saxony                        | 137 (94–276)        | 04/16/2020 (04/11/2020–04/17/2020) | 201 (169–517)       | 57 (45–131)           | 52 (41–124)              | 0 (0–0)           | 0 (0–0)           | 201 (2765–8860)       | 1182 (796–2412)        | 1055 (714–2152)            |
| Schleswig–Holstein            | 70 (55–113)         | 04/10/2020 (04/10/2020–04/18/2020) | 110 (100–190)       | 28 (26–53)            | 25 (24–49)               | 0 (0–0)           | 0 (0–0)           | 110 (1553–3738)       | 609 (454–1002)         | 543 (408–892)              |
| Thuringia                     | 67 (45–135)         | 04/14/2020 (04/11/2020–04/16/2020) | 112 (96–211)        | 31 (26–54)            | 29 (24–50)               | 0 (0–0)           | 0 (0–0)           | 112 (1255–4305)       | 576 (367–1161)         | 514 (330–1037)             |
| Greece                        | 119 (105–176)       | 04/01/2020 (04/01/2020–04/17/2020) | 149 (137–246)       | 41 (40–68)            | 38 (36–63)               | 0 (0–0)           | 0 (0–0)           | 149 (2880–5705)       | 1018 (852–1566)        | 912 (769–1398)             |
| Hungary                       | 305 (153–795)       | 04/18/2020 (04/10/2020–04/18/2020) | 507 (342–1907)      | 129 (85–435)          | 116 (79–408)             | 0 (0–0)           | 0 (0–0)           | 507 (5076–27919)      | 2757 (1357–7156)       | 2433 (1199–6297)           |
| Iceland                       | 19 (9–81)           | 04/06/2020 (04/06/2020–05/04/2020) | 20 (16–72)          | 5 (4–18)              | 5 (4–16)                 | 0 (0–0)           | 0 (0–5)           | 20 (236–3114)         | 175 (68–773)           | 153 (62–676)               |
| Ireland                       | 890 (516–2297)      | 04/15/2020 (04/11/2020–04/18/2020) | 1410 (1149–5741)    | 327 (271–1201)        | 294 (245–1122)           | 0 (0–2438)        | 256 (200–1130)    | 1410 (19072–90886)    | 8379 (4763–22025)      | 7316 (4171–19214)          |
| Italy                         | 26007 (23589–31056) | 03/28/2020 (03/28/2020–04/17/2020) | 24029 (23651–24429) | 6681 (6630–6825)      | 6089 (6046–6249)         | 0 (0–0)           | 4622 (4571–4766)  | 24029 (702638–951530) | 222179 (199885–266815) | 199048 (179250–238960)     |
| Abruzzo                       | 286 (255–354)       | 03/29/2020 (03/29/2020–04/18/2020) | 322 (306–347)       | 91 (88–102)           | 84 (82–93)               | 0 (0–0)           | 0 (0–0)           | 322 (7219–11051)      | 2437 (2110–3073)       | 2185 (1900–2743)           |
| Basilicata                    | 23 (22–30)          | 03/31/2020 (03/31/2020–04/15/2020) | 36 (31–43)          | 10 (9–12)             | 9 (9–11)                 | 0 (0–0)           | 0 (0–0)           | 36 (541–1000)         | 197 (167–266)          | 176 (153–237)              |
| Calabria                      | 77 (73–94)          | 03/31/2020 (03/31/2020–03/31/2020) | 130 (120–141)       | 33 (32–34)            | 30 (29–31)               | 0 (0–0)           | 0 (0–0)           | 130 (2044–3196)       | 665 (593–847)          | 594 (535–753)              |
| Campania                      | 316 (294–372)       | 03/23/2020 (03/23/2020–04/15/2020) | 394 (374–419)       | 107 (104–110)         | 94 (92–97)               | 0 (0–0)           | 0 (0–0)           | 394 (9413–13085)      | 2819 (2550–3382)       | 2498 (2264–2990)           |
| Emilia–Romagna                | 3297 (3065–3764)    | 03/26/2020 (03/26/2020–03/26/2020) | 2727 (2634–2828)    | 784 (769–799)         | 705 (694–717)            | 0 (0–0)           | 0 (0–0)           | 2727 (87661–114738)   | 27950 (25536–32304)    | 25092 (22981–28980)        |
| Friuli–Venezia Giulia         | 256 (230–312)       | 03/29/2020 (03/29/2020–03/29/2020) | 241 (229–255)       | 68 (66–70)            | 62 (61–65)               | 0 (0–0)           | 0 (0–0)           | 241 (6383–9640)       | 2166 (1889–2691)       | 1945 (1703–2409)           |
| Lazio                         | 376 (335–464)       | 03/30/2020 (03/30/2020–04/15/2020) | 381 (365–431)       | 103 (100–120)         | 93 (91–109)              | 0 (0–0)           | 0 (0–0)           | 381 (9920–15050)      | 3248 (2820–4093)       | 2902 (2529–3644)           |
| Liguria                       | 1046 (914–1290)     | 03/27/2020 (03/27/2020–04/18/2020) | 799 (776–994)       | 244 (240–290)         | 221 (217–268)            | 0 (0–0)           | 0 (0–0)           | 799 (24640–36922)     | 8677 (7451–10830)      | 7838 (6743–9778)           |
| Lombardia                     | 13162 (12220–15146) | 03/27/2020 (03/27/2020–03/27/2020) | 13311 (12956–13654) | 3715 (3666–3767)      | 3371 (3332–3412)         | 0 (0–0)           | 0 (0–0)           | 13311 (363813–476190) | 112990 (103300–131753) | 101090 (92642–117739)      |
| Marche                        | 879 (804–1026)      | 03/29/2020 (03/29/2020–03/29/2020) | 904 (876–935)       | 260 (256–265)         | 237 (233–240)            | 0 (0–0)           | 0 (0–0)           | 904 (22598–30732)     | 7407 (6652–8749)       | 6660 (6001–7853)           |
| Molise                        | 16 (16–16)          | 03/19/2020 (03/19/2020–03/19/2020) | 28 (24–33)          | 8 (8–9)               | 8 (7–8)                  | 0 (0–0)           | 0 (0–0)           | 28 (367–605)          | 135 (117–158)          | 121 (108–139)              |
| Piemonte                      | 2882 (2365–3876)    | 04/12/2020 (04/11/2020–04/18/2020) | 2665 (2570–4430)    | 746 (734–1242)        | 681 (673–1142)           | 0 (0–0)           | 0 (0–0)           | 2665 (67471–116914)   | 24351 (19743–33335)    | 21881 (17756–29822)        |
| Provincia autonoma di Bolzano | 273 (237–337)       | 03/31/2020 (03/31/2020–03/31/2020) | 409 (390–428)       | 113 (111–116)         | 104 (102–106)            | 0 (0–0)           | 0 (0–0)           | 409 (7129–11229)      | 2382 (2005–2996)       | 2121 (1792–2663)           |
| Provincia autonoma di Trento  | 402 (341–556)       | 03/26/2020 (03/26/2020–04/18/2020) | 448 (429–627)       | 116 (113–172)         | 105 (103–160)            | 0 (0–0)           | 0 (0–0)           | 448 (10092–17737)     | 3471 (2873–4860)       | 3101 (2575–4336)           |
| Puglia                        | 383 (330–480)       | 04/01/2020 (04/01/2020–04/17/2020) | 440 (421–467)       | 115 (113–126)         | 107 (105–114)            | 0 (0–0)           | 0 (0–0)           | 440 (9882–15658)      | 3320 (2787–4238)       | 2962 (2500–3766)           |
| Sardegna                      | 92 (85–120)         | 04/06/2020 (04/06/2020–04/15/2020) | 140 (130–165)       | 38 (37–46)            | 35 (34–42)               | 0 (0–0)           | 0 (0–0)           | 140 (2408–4014)       | 799 (696–1073)         | 714 (626–953)              |
| Sicilia                       | 208 (192–252)       | 03/27/2020 (03/27/2020–03/27/2020) | 269 (252–285)       | 69 (67–78)            | 64 (62–70)               | 0 (0–0)           | 0 (0–0)           | 269 (5727–8398)       | 1817 (1615–2242)       | 1619 (1447–1993)           |
| Toscana                       | 724 (633–913)       | 04/11/2020 (04/11/2020–04/17/2020) | 701 (677–994)       | 198 (194–281)         | 180 (178–258)            | 0 (0–0)           | 0 (0–0)           | 701 (17870–27400)     | 6114 (5251–7804)       | 5496 (4735–7006)           |
| Umbria                        | 55 (55–60)          | 03/26/2020 (03/26/2020–03/26/2020) | 75 (67–83)          | 23 (22–24)            | 21 (20–22)               | 0 (0–0)           | 0 (0–0)           | 75 (1398–1951)        | 466 (429–532)          | 420 (390–475)              |

medRxiv preprint doi: <https://doi.org/10.1101/2020.04.21.20074732>; this version posted April 26, 2020. The copyright holder for this preprint (which was not certified by peer review) is the author/funder, who has granted medRxiv a license to display the preprint in perpetuity. It is made available under aCC-BY 4.0 International license.



| Location name            | Cumulative Deaths    | Date of Peak Hospital use          | Beds Used at Peak    | ICU Beds Used at Peak | Ventilators Used at Peak | Excess Bed Demand   | Excess ICU Demand | Cumulative Bed Days     | Cumulative ICU Days     | Cumulative Ventilator Days |
|--------------------------|----------------------|------------------------------------|----------------------|-----------------------|--------------------------|---------------------|-------------------|-------------------------|-------------------------|----------------------------|
| Valle d'Aosta            | 135 (122–178)        | 03/31/2020 (03/31/2020–03/31/2020) | 198 (185–211)        | 55 (53–57)            | 50 (49–52)               | 0 (0–0)             | 0 (0–0)           | 198 (3392–5682)         | 1156 (999–1557)         | 1035 (900–1389)            |
| Veneto                   | 1118 (1001–1415)     | 03/26/2020 (03/26/2020–04/16/2020) | 1084 (1051–1465)     | 298 (293–403)         | 270 (266–369)            | 0 (0–0)             | 0 (0–0)           | 1084 (29857–44885)      | 9613 (8477–12327)       | 8596 (7601–10997)          |
| Latvia                   | 80 (11–285)          | 04/26/2020 (04/07/2020–04/25/2020) | 91 (14–330)          | 24 (4–87)             | 22 (4–79)                | 0 (0–0)             | 0 (0–23)          | 91 (162–10786)          | 705 (53–2882)           | 626 (45–2559)              |
| Lithuania                | 39 (32–69)           | 04/10/2020 (04/10/2020–04/17/2020) | 68 (60–140)          | 17 (17–37)            | 16 (16–34)               | 0 (0–0)             | 0 (0–0)           | 68 (900–2367)           | 345 (260–617)           | 307 (234–544)              |
| Luxembourg               | 116 (71–265)         | 04/06/2020 (04/06/2020–04/18/2020) | 153 (140–487)        | 35 (34–106)           | 32 (31–99)               | 0 (0–0)             | 0 (0–70)          | 153 (2322–9997)         | 1073 (624–2469)         | 941 (550–2173)             |
| Netherlands              | 6814 (4035–14051)    | 04/16/2020 (04/03/2020–04/18/2020) | 5761 (4908–15311)    | 1452 (1269–3569)      | 1303 (1133–3339)         | 0 (0–0)             | 533 (350–2650)    | 5761 (133187–501154)    | 61396 (35169–129013)    | 54221 (31230–114002)       |
| Norway                   | 280 (167–624)        | 04/07/2020 (04/07/2020–04/18/2020) | 282 (265–828)        | 73 (71–194)           | 66 (64–180)              | 0 (0–0)             | 0 (0–93)          | 282 (5510–23323)        | 2547 (1462–5904)        | 2243 (1294–5206)           |
| Portugal                 | 980 (661–2003)       | 04/16/2020 (04/11/2020–04/18/2020) | 1096 (952–3928)      | 302 (266–996)         | 271 (240–940)            | 0 (0–0)             | 190 (154–884)     | 1096 (20181–63950)      | 8507 (5650–17513)       | 7588 (5050–15593)          |
| Poland                   | 646 (337–2020)       | 04/16/2020 (04/11/2020–04/18/2020) | 771 (678–3389)       | 196 (180–753)         | 174 (163–702)            | 0 (0–0)             | 0 (0–0)           | 771 (11554–72641)       | 5904 (3011–18409)       | 5195 (2656–16211)          |
| Romania                  | 618 (413–1489)       | 04/16/2020 (04/07/2020–04/18/2020) | 923 (749–4173)       | 241 (188–1034)        | 215 (170–973)            | 0 (0–0)             | 0 (0–0)           | 923 (13782–53650)       | 5561 (3656–13879)       | 4913 (3233–12219)          |
| Slovakia                 | 252 (41–955)         | 04/18/2020 (04/19/2020–04/18/2020) | 1123 (149–4409)      | 237 (33–935)          | 226 (30–886)             | 0 (0–0)             | 49 (0–747)        | 1123 (1506–37134)       | 2374 (378–9002)         | 2072 (331–7865)            |
| Spain                    | 23680 (20269–31608)  | 03/29/2020 (03/29/2020–04/17/2020) | 26474 (26066–35145)  | 6961 (6905–9398)      | 6343 (6302–8652)         | 0 (0–3355)          | 5597 (5541–8034)  | 26474 (637743–1018635)  | 206496 (175544–276670)  | 183962 (156513–246374)     |
| Andalucia                | 1099 (950–1492)      | 04/06/2020 (04/06/2020–04/16/2020) | 1486 (1445–1900)     | 414 (408–515)         | 377 (372–470)            | 0 (0–0)             | 0 (0–0)           | 1486 (29342–48738)      | 9583 (8150–13152)       | 8539 (7278–11707)          |
| Aragon                   | 759 (605–1056)       | 04/04/2020 (04/04/2020–04/16/2020) | 815 (786–1182)       | 234 (230–318)         | 210 (207–289)            | 0 (0–0)             | 0 (0–0)           | 815 (18687–34310)       | 6620 (5204–9286)        | 5897 (4642–8263)           |
| Asturias                 | 225 (172–410)        | 04/09/2020 (04/09/2020–04/17/2020) | 284 (269–768)        | 75 (73–201)           | 68 (67–189)              | 0 (0–0)             | 0 (0–0)           | 284 (5126–13353)        | 1966 (1455–3556)        | 1752 (1301–3175)           |
| Balearic Islands         | 154 (131–228)        | 03/28/2020 (03/28/2020–04/16/2020) | 203 (190–333)        | 53 (51–88)            | 49 (47–81)               | 0 (0–0)             | 0 (0–0)           | 203 (3868–7619)         | 1340 (1099–2016)        | 1194 (986–1796)            |
| Canary Islands           | 115 (107–134)        | 03/28/2020 (03/28/2020–03/28/2020) | 195 (181–211)        | 53 (52–55)            | 49 (47–50)               | 0 (0–0)             | 0 (0–0)           | 195 (3115–4594)         | 999 (888–1209)          | 890 (797–1071)             |
| Cantabria                | 173 (137–295)        | 03/31/2020 (03/31/2020–04/17/2020) | 212 (198–475)        | 55 (53–124)           | 49 (48–115)              | 0 (0–0)             | 0 (0–0)           | 212 (4080–9799)         | 1507 (1158–2616)        | 1342 (1035–2324)           |
| Castilla–La Mancha       | 2475 (1959–3630)     | 04/08/2020 (04/08/2020–04/17/2020) | 2432 (2362–4882)     | 656 (646–1251)        | 587 (579–1161)           | 0 (0–0)             | 0 (0–0)           | 2432 (60936–118300)     | 21584 (16887–31923)     | 19230 (15077–28405)        |
| Catalonia                | 4743 (4100–6320)     | 03/29/2020 (03/28/2020–04/17/2020) | 6281 (6028–6928)     | 1657 (1626–1826)      | 1526 (1502–1687)         | 0 (0–0)             | 0 (0–0)           | 6281 (125495–206956)    | 41367 (35004–55711)     | 36852 (31290–49585)        |
| Community of Madrid      | 7867 (7181–9195)     | 03/24/2020 (03/24/2020–03/24/2020) | 9182 (8895–9492)     | 2398 (2358–2440)      | 2176 (2147–2210)         | 0 (0–0)             | 0 (0–0)           | 9182 (221673–303231)    | 68614 (61563–81483)     | 61125 (54960–72519)        |
| Extremadura              | 468 (378–700)        | 03/28/2020 (03/28/2020–04/17/2020) | 561 (539–931)        | 148 (145–244)         | 135 (133–226)            | 0 (0–0)             | 0 (0–0)           | 561 (11587–22901)       | 4083 (3236–6173)        | 3637 (2889–5493)           |
| Galicia                  | 378 (324–518)        | 03/31/2020 (03/31/2020–04/16/2020) | 530 (507–615)        | 133 (130–163)         | 124 (122–149)            | 0 (0–0)             | 0 (0–0)           | 530 (9859–17020)        | 3296 (2767–4562)        | 2936 (2474–4052)           |
| La Rioja                 | 345 (279–515)        | 04/06/2020 (04/06/2020–04/17/2020) | 384 (365–640)        | 105 (102–171)         | 95 (93–156)              | 0 (0–0)             | 0 (0–0)           | 384 (8494–17097)        | 3013 (2383–4593)        | 2684 (2130–4073)           |
| Murcia                   | 129 (111–196)        | 04/02/2020 (04/02/2020–04/17/2020) | 210 (197–308)        | 56 (54–82)            | 51 (49–77)               | 0 (0–0)             | 0 (0–0)           | 210 (3270–6519)         | 1123 (929–1727)         | 1000 (832–1539)            |
| Navarre                  | 319 (270–469)        | 03/29/2020 (03/29/2020–04/16/2020) | 436 (416–647)        | 113 (111–167)         | 104 (102–156)            | 0 (0–0)             | 0 (0–0)           | 436 (8166–15535)        | 2778 (2290–4171)        | 2475 (2049–3705)           |
| Valencian Community      | 1220 (1016–1762)     | 03/30/2020 (03/30/2020–04/17/2020) | 1505 (1461–2394)     | 395 (389–630)         | 361 (356–585)            | 0 (0–0)             | 0 (0–0)           | 1505 (31510–57416)      | 10640 (8738–15508)      | 9480 (7803–13803)          |
| Sweden                   | 5890 (1965–16883)    | 04/29/2020 (04/11/2020–04/21/2020) | 4173 (2350–13825)    | 1099 (652–3672)       | 979 (577–3235)           | 2365 (542–12017)    | 1020 (573–3593)   | 4173 (62421–568761)     | 52143 (17091–151841)    | 46270 (15174–134608)       |
| United Kingdom           | 37521 (17625–89385)  | 04/20/2020 (04/08/2020–04/18/2020) | 42407 (27463–132942) | 10646 (6947–31240)    | 9577 (6312–28710)        | 24642 (9698–115177) | 3865 (166–24459)  | 42407 (600161–3074135)  | 337062 (157746–800822)  | 297904 (139414–707443)     |
| United States of America | 60308 (34063–140381) | 04/15/2020 (04/11/2020–04/18/2020) | 68884 (57922–226051) | 18286 (15494–54755)   | 16631 (14188–51508)      | 9079 (3857–88921)   | 9356 (7718–38347) | 68884 (1049489–4558549) | 523419 (292547–1228976) | 466888 (261704–1093763)    |
| Alabama                  | 295 (145–802)        | 04/17/2020 (04/11/2020–04/18/2020) | 329 (219–1245)       | 96 (64–350)           | 89 (60–331)              | 0 (0–0)             | 0 (0–0)           | 329 (3706–21985)        | 2421 (1167–6624)        | 2193 (1061–6010)           |
| Arizona                  | 267 (158–682)        | 04/10/2020 (04/10/2020–04/18/2020) | 312 (294–1061)       | 77 (74–237)           | 69 (67–220)              | 0 (0–0)             | 0 (0–0)           | 312 (5395–26079)        | 2454 (1403–6486)        | 2155 (1239–5699)           |
| Arkansas                 | 158 (37–527)         | 04/30/2020 (04/12/2020–05/02/2020) | 129 (74–519)         | 32 (20–128)           | 28 (19–112)              | 0 (0–0)             | 0 (0–0)           | 129 (1188–19809)        | 1453 (320–4942)         | 1276 (283–4332)            |
| California               | 1658 (1068–3548)     | 04/14/2020 (04/11/2020–04/18/2020) | 2753 (2240–8233)     | 633 (516–1741)        | 563 (465–1608)           | 0 (0–0)             | 0 (0–0)           | 2753 (41690–144832)     | 15911 (10103–34295)     | 13827 (8795–29771)         |
| Colorado                 | 715 (389–1944)       | 04/17/2020 (04/11/2020–04/18/2020) | 842 (799–3677)       | 205 (193–786)         | 181 (172–739)            | 0 (0–0)             | 0 (0–232)         | 842 (14205–73527)       | 6656 (3586–18172)       | 5828 (3149–15942)          |
| Connecticut              | 2732 (1163–8601)     | 04/16/2020 (04/11/2020–04/18/2020) | 3886 (2737–16784)    | 935 (639–3798)        | 860 (596–3504)           | 2148 (999–15046)    | 836 (540–3699)    | 3886 (39775–312943)     | 24819 (10391–79660)     | 21865 (9160–70188)         |
| Delaware                 | 143 (64–404)         | 04/17/2020 (04/11/2020–04/19/2020) | 260 (162–954)        | 57 (31–196)           | 50 (29–178)              | 0 (0–258)           | 16 (0–155)        | 260 (2415–17243)        | 1392 (589–3993)         | 1205 (514–3451)            |
| District of Columbia     | 170 (87–424)         | 04/15/2020 (04/11/2020–04/18/2020) | 290 (238–918)        | 68 (53–197)           | 61 (49–180)              | 0 (0–0)             | 2 (0–131)         | 290 (3093–17063)        | 1607 (795–4112)         | 1402 (698–3572)            |
| Florida                  | 1363 (775–3430)      | 04/14/2020 (04/11/2020–04/18/2020) | 1535 (1386–5229)     | 405 (362–1251)        | 367 (332–1180)           | 0 (0–0)             | 0 (0–0)           | 1535 (24580–113743)     | 12021 (6705–30351)      | 10675 (5966–26980)         |
| Georgia                  | 1369 (670–3828)      | 04/15/2020 (04/05/2020–04/18/2020) | 1358 (1079–5783)     | 350 (287–1291)        | 311 (262–1209)           | 0 (0–0)             | 0 (0–702)         | 1358 (22705–140596)     | 12398 (5967–36009)      | 10936 (5278–31752)         |
| Hawaii                   | 38 (10–121)          | 04/18/2020 (04/01/2020–04/18/2020) | 116 (20–434)         | 26 (6–100)            | 25 (5–95)                | 0 (0–0)             | 0 (0–55)          | 116 (294–4448)          | 353 (84–1122)           | 310 (75–987)               |
| Idaho                    | 63 (41–145)          | 04/10/2020 (04/10/2020–04/18/2020) | 119 (109–309)        | 29 (25–73)            | 26 (24–67)               | 0 (0–0)             | 0 (0–0)           | 119 (1354–5481)         | 583 (358–1357)          | 511 (316–1184)             |
| Illinois                 | 2259 (1212–5054)     | 04/17/2020 (04/11/2020–04/18/2020) | 3459 (2672–11295)    | 837 (638–2464)        | 752 (581–2310)           | 0 (0–0)             | 0 (0–1333)        | 3459 (43782–190312)     | 20895 (11093–47173)     | 18327 (9744–41412)         |
| Indiana                  | 903 (519–2529)       | 04/15/2020 (04/10/2020–04/18/2020) | 1374 (1134–5590)     | 329 (264–1212)        | 294 (237–1130)           | 0 (0–0)             | 0 (0–506)         | 1374 (18792–94944)      | 8390 (4762–23466)       | 7349 (4176–20542)          |
| Iowa                     | 624 (106–2603)       | 05/07/2020 (04/11/2020–05/08/2020) | 580 (137–2723)       | 148 (35–699)          | 132 (33–621)             | 0 (0–0)             | 0 (0–453)         | 580 (3537–93259)        | 5634 (942–24278)        | 4973 (830–21439)           |
| Kansas                   | 187 (88–500)         | 04/17/2020 (04/09/2020–04/18/2020) | 250 (207–843)        | 58 (51–180)           | 51 (46–160)              | 0 (0–0)             | 0 (0–0)           | 250 (3307–20908)        | 1824 (810–4860)         | 1579 (709–4199)            |
| Kentucky                 | 407 (160–1213)       | 04/21/2020 (04/08/2020–04/21/2020) | 455 (313–1806)       | 110 (70–421)          | 97 (62–378)              | 0 (0–0)             | 0 (0–0)           | 455 (5660–46733)        | 3789 (1455–11540)       | 3318 (1275–10092)          |
| Louisiana                | 1685 (1269–2767)     | 04/14/2020 (04/11/2020–04/18/2020) | 2619 (2355–5469)     | 648 (563–1265)        | 576 (505–1154)           | 0 (0–0)             | 171 (86–788)      | 2619 (47125–107918)     | 15783 (11750–26198)     | 13798 (10287–22824)        |
| Maine                    | 51 (27–134)          | 04/16/2020 (04/11/2020–04/19/2020) | 83 (53–274)          | 19 (13–58)            | 17 (12–53)               | 0 (0–0)             | 0 (0–0)           | 83 (916–5449)           | 486 (235–1300)          | 424 (207–1131)             |

medRxiv preprint doi: <https://doi.org/10.1101/2020.04.21.20074732>; this version posted April 26, 2020. The copyright holder for this preprint (which was not certified by peer review) is the author/funder, who has granted medRxiv a license to display the preprint in perpetuity. It is made available under a CC-BY 4.0 International license.

medRxiv preprint doi: <https://doi.org/10.1101/2020.04.21.20117722>; this version posted April 26, 2020. The copyright holder for this preprint (which was not certified by peer review) is the author/funder, who has granted medRxiv a license to display the preprint in perpetuity. It is made available under aCC-BY 4.0 International license.

| Location name  | Cumulative Deaths   | Date of Peak Hospital use          | Beds Used at Peak   | ICU Beds Used at Peak | Ventilators Used at Peak | Excess Bed Demand | Excess ICU Demand | Cumulative Bed Days   | Cumulative ICU Days    | Cumulative Ventilator Days |
|----------------|---------------------|------------------------------------|---------------------|-----------------------|--------------------------|-------------------|-------------------|-----------------------|------------------------|----------------------------|
| Maryland       | 914 (373–3160)      | 04/18/2020 (04/09/2020–04/18/2020) | 2405 (1455–11111)   | 441 (258–1857)        | 376 (228–1629)           | 0 (0–7150)        | 175 (0–1591)      | 2405 (20439–178003)   | 10363 (4145–35424)     | 8658 (3467–29604)          |
| Massachusetts  | 3235 (1289–9426)    | 04/18/2020 (04/11/2020–04/18/2020) | 2830 (1967–10962)   | 964 (685–3581)        | 906 (656–3459)           | 0 (0–6114)        | 687 (408–3304)    | 2830 (27062–211980)   | 24872 (9684–73469)     | 22963 (8946–67939)         |
| Michigan       | 3304 (2131–6780)    | 04/19/2020 (04/10/2020–04/18/2020) | 4748 (4615–14655)   | 1158 (1139–3347)      | 1048 (1033–3110)         | 0 (0–4501)        | 416 (397–2605)    | 4748 (74403–250353)   | 30192 (19234–63001)    | 26566 (16956–55325)        |
| Minnesota      | 195 (95–605)        | 04/18/2020 (04/10/2020–04/18/2020) | 293 (230–1350)      | 69 (53–278)           | 62 (48–259)              | 0 (0–0)           | 0 (0–0)           | 293 (3379–23752)      | 1838 (855–5748)        | 1604 (751–5002)            |
| Mississippi    | 369 (150–1298)      | 04/23/2020 (04/06/2020–04/21/2020) | 410 (271–1985)      | 102 (64–482)          | 90 (58–428)              | 0 (0–0)           | 0 (0–142)         | 410 (5225–49082)      | 3421 (1349–12188)      | 2999 (1186–10683)          |
| Missouri       | 362 (188–1027)      | 04/15/2020 (04/09/2020–04/18/2020) | 474 (382–1913)      | 120 (94–424)          | 107 (85–397)             | 0 (0–0)           | 0 (0–0)           | 474 (6508–37351)      | 3322 (1694–9446)       | 2919 (1493–8278)           |
| Montana        | 17 (8–43)           | 04/17/2020 (03/30/2020–04/17/2020) | 40 (24–163)         | 10 (7–39)             | 9 (6–37)                 | 0 (0–0)           | 0 (0–0)           | 40 (224–1671)         | 152 (63–414)           | 134 (56–367)               |
| Nebraska       | 127 (21–479)        | 05/01/2020 (04/06/2020–04/29/2020) | 101 (46–438)        | 25 (11–110)           | 22 (10–98)               | 0 (0–0)           | 0 (0–0)           | 101 (644–17975)       | 1169 (178–4524)        | 1027 (158–3971)            |
| Nevada         | 257 (149–562)       | 04/07/2020 (04/07/2020–04/18/2020) | 364 (344–1219)      | 87 (83–256)           | 79 (77–237)              | 0 (0–0)           | 0 (0–73)          | 364 (5554–23196)      | 2455 (1372–5511)       | 2135 (1198–4795)           |
| New Hampshire  | 55 (32–127)         | 04/15/2020 (04/10/2020–04/18/2020) | 95 (79–296)         | 24 (18–68)            | 21 (17–63)               | 0 (0–0)           | 0 (0–0)           | 95 (1033–4793)        | 503 (276–1186)         | 442 (245–1035)             |
| New Jersey     | 6952 (4160–14367)   | 04/15/2020 (04/11/2020–04/18/2020) | 10480 (8644–27673)  | 2568 (2078–6284)      | 2324 (1902–5855)         | 2665 (829–19858)  | 2103 (1614–5819)  | 10480 (146278–527991) | 63655 (37795–133132)   | 55973 (33286–117091)       |
| New Mexico     | 80 (36–229)         | 04/18/2020 (04/10/2020–04/18/2020) | 118 (102–458)       | 29 (25–104)           | 26 (23–96)               | 0 (0–0)           | 0 (0–0)           | 118 (1169–8794)       | 739 (314–2196)         | 649 (278–1926)             |
| New York       | 21812 (13623–42798) | 04/15/2020 (04/10/2020–04/17/2020) | 17346 (16061–49532) | 6039 (5567–16551)     | 5603 (5208–15854)        | 4336 (3051–36522) | 5321 (4849–15833) | 17346 (295917–954519) | 167923 (104084–329040) | 154958 (96145–303878)      |
| North Carolina | 251 (156–529)       | 04/15/2020 (04/11/2020–04/18/2020) | 523 (368–1366)      | 123 (90–304)          | 112 (81–281)             | 0 (0–0)           | 0 (0–0)           | 523 (5585–20350)      | 2342 (1420–4965)       | 2050 (1247–4337)           |
| North Dakota   | 149 (9–652)         | 05/04/2020 (04/10/2020–05/06/2020) | 137 (20–630)        | 34 (5–157)            | 30 (4–138)               | 0 (0–0)           | 0 (0–71)          | 137 (255–24256)       | 1375 (73–6065)         | 1207 (65–5327)             |
| Ohio           | 716 (429–1645)      | 04/15/2020 (04/11/2020–04/18/2020) | 1230 (934–3759)     | 300 (226–847)         | 274 (207–794)            | 0 (0–0)           | 0 (0–0)           | 1230 (14924–60064)    | 6547 (3863–15215)      | 5760 (3401–13374)          |
| Oklahoma       | 359 (149–1166)      | 04/15/2020 (04/06/2020–04/20/2020) | 359 (250–1396)      | 86 (64–335)           | 77 (58–299)              | 0 (0–0)           | 0 (0–0)           | 359 (5161–45818)      | 3331 (1333–11331)      | 2919 (1174–9939)           |
| Oregon         | 131 (69–318)        | 04/17/2020 (04/08/2020–04/18/2020) | 173 (145–603)       | 38 (33–116)           | 33 (30–105)              | 0 (0–0)           | 0 (0–0)           | 173 (2815–14748)      | 1326 (662–3262)        | 1138 (571–2797)            |
| Pennsylvania   | 1707 (914–4555)     | 04/15/2020 (04/11/2020–04/18/2020) | 3926 (3359–14724)   | 773 (612–2512)        | 663 (549–2291)           | 0 (0–329)         | 0 (0–1469)        | 3926 (45991–236824)   | 18443 (9717–49122)     | 15578 (8226–41512)         |
| Rhode Island   | 438 (121–1656)      | 04/23/2020 (04/09/2020–04/24/2020) | 610 (224–2628)      | 152 (56–655)          | 136 (52–587)             | 0 (0–1833)        | 111 (15–614)      | 610 (3996–58949)      | 3976 (1062–15072)      | 3505 (941–13269)           |
| South Carolina | 217 (127–469)       | 04/15/2020 (04/10/2020–04/18/2020) | 277 (254–777)       | 68 (60–173)           | 62 (55–158)              | 0 (0–0)           | 0 (0–0)           | 277 (4394–18076)      | 2014 (1136–4422)       | 1764 (999–3878)            |
| South Dakota   | 94 (7–378)          | 05/10/2020 (04/02/2020–05/08/2020) | 102 (18–501)        | 26 (5–128)            | 23 (4–114)               | 0 (0–0)           | 0 (0–54)          | 102 (177–14900)       | 849 (52–3823)          | 748 (47–3362)              |
| Tennessee      | 231 (136–470)       | 04/04/2020 (04/04/2020–04/18/2020) | 282 (267–690)       | 71 (69–158)           | 65 (63–144)              | 0 (0–0)           | 0 (0–0)           | 282 (4630–17481)      | 2104 (1222–4392)       | 1853 (1078–3868)           |
| Texas          | 957 (472–2520)      | 04/15/2020 (04/11/2020–04/18/2020) | 1364 (1092–4851)    | 308 (242–1025)        | 270 (218–933)            | 0 (0–0)           | 0 (0–0)           | 1364 (18370–104777)   | 9239 (4451–24648)      | 8017 (3875–21418)          |
| Utah           | 202 (40–753)        | 04/24/2020 (04/10/2020–04/25/2020) | 332 (75–1304)       | 69 (16–270)           | 58 (14–229)              | 0 (0–0)           | 0 (0–100)         | 332 (1805–39658)      | 2192 (407–8194)        | 1849 (347–6921)            |
| Vermont        | 40 (33–75)          | 04/01/2020 (04/01/2020–04/17/2020) | 54 (48–158)         | 14 (13–36)            | 12 (12–34)               | 0 (0–0)           | 0 (0–2)           | 54 (995–2825)         | 364 (272–702)          | 321 (244–617)              |
| Virginia       | 763 (277–2465)      | 04/23/2020 (04/10/2020–04/24/2020) | 1110 (745–4374)     | 243 (124–949)         | 208 (111–815)            | 0 (0–0)           | 0 (0–620)         | 1110 (12399–114439)   | 7849 (2787–25114)      | 6706 (2385–21462)          |
| Washington     | 694 (611–883)       | 04/05/2020 (04/05/2020–04/18/2020) | 1043 (1008–1108)    | 241 (237–260)         | 216 (213–233)            | 0 (0–0)           | 0 (0–0)           | 1043 (22444–35187)    | 6515 (5606–8436)       | 5692 (4913–7359)           |
| West Virginia  | 22 (12–58)          | 04/14/2020 (04/12/2020–04/18/2020) | 47 (30–170)         | 11 (8–39)             | 10 (8–37)                | 0 (0–0)           | 0 (0–0)           | 47 (338–2145)         | 196 (96–538)           | 173 (86–472)               |
| Wisconsin      | 302 (211–609)       | 04/11/2020 (04/11/2020–04/18/2020) | 425 (403–1172)      | 108 (99–274)          | 95 (90–253)              | 0 (0–0)           | 0 (0–102)         | 425 (7243–22391)      | 2766 (1885–5601)       | 2432 (1665–4931)           |
| Wyoming        | 243 (44–948)        | 04/30/2020 (04/24/2020–05/01/2020) | 670 (117–3024)      | 150 (21–663)          | 137 (18–611)             | 0 (0–1955)        | 106 (0–619)       | 670 (803–44921)       | 2276 (223–10788)       | 1991 (178–9590)            |
